# Supplementary material for: Aromaticity of the planar hetero[8]circulenes and their doubly charged ions: NICS and GIMIC characterization
Source: Royal Society of Chemistry journal article supplement (doi:10.1039/c4cp00860j), 2014-01-01
Supplement: c4cp00860j1.pdf [file c4cp00860j1.pdf]

## Aromaticity of the planar hetero[8]circulenes and of their doubly charged ions: NICS and GIMIC characterization

G. V. Baryshnikov,<sup>a</sup> R. R. Valiev<sup>b,c</sup>, N. N. Karaush<sup>a</sup>, and B. F. Minaev<sup>a,b</sup>

<sup>a</sup> Bohdan Khmelnytsky National University, Cherkassy, 18031, Ukraine. E-mail: glebchem@rambler.ru, bfmin@rambler.ru

<sup>b</sup> Tomsk State University, 634050, Tomsk, Russian Federation

<sup>c</sup> National Research Tomsk Polytechnic University, Tomsk 634050, Russian Federation.

### Electronic Supplementary Information

#### List of Content

|          |                                                                                                                                  |           |
|----------|----------------------------------------------------------------------------------------------------------------------------------|-----------|
| <b>1</b> | <b>Figure S1.</b> The bond lengths (Å) for the ground state of the molecules <b>1-3</b> and their ions                           | <b>2</b>  |
| <b>2</b> | <b>Figure S2.</b> Mulliken charge distribution for the ground singlet state for the anionic forms of the compound <b>3</b>       | <b>3</b>  |
| <b>3</b> | <b>Figure S3.</b> The bond lengths (Å) for the ground state of the molecules <b>4-7</b> and their ions                           | <b>4</b>  |
| <b>4</b> | <b>Figure S4.</b> The ring-current densities and ring-current strengths in hetero[8]circulenes <b>4-7</b> molecules.             | <b>5</b>  |
| <b>5</b> | <b>Figure S5.</b> The NICS(0) and NICS (1) indexes for the ground state of the molecules <b>1-3</b> and their ions               | <b>7</b>  |
| <b>6</b> | <b>Figure S7.</b> The NICS(0) and NICS (1) indexes for the ground singlet state of the molecules <b>4-7</b> and their ions       | <b>8</b>  |
| <b>7</b> | <b>Figure S6.</b> NICS(0) and NICS(1) indexes, calculated for the singlet state dications of the compounds <b>2</b> and <b>3</b> | <b>9</b>  |
| <b>8</b> | Optimized Cartesian coordinates of the compounds <b>1-5</b> and their ions (Tables S1-S37)                                       | <b>10</b> |



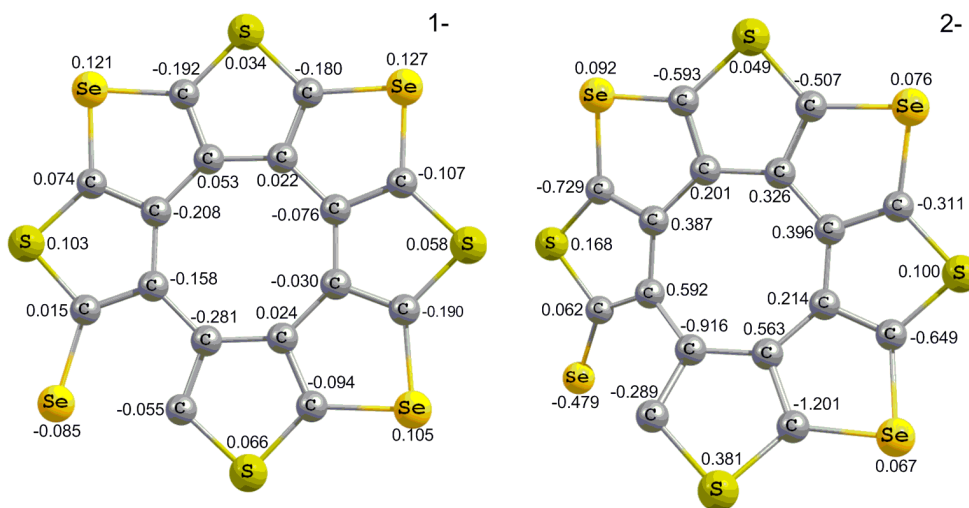

**Figure S2.** Mulliken charge distribution for the ground singlet state for the anionic forms of the compound **3** calculated at the B3LYP/6-31+G(d) level of theory

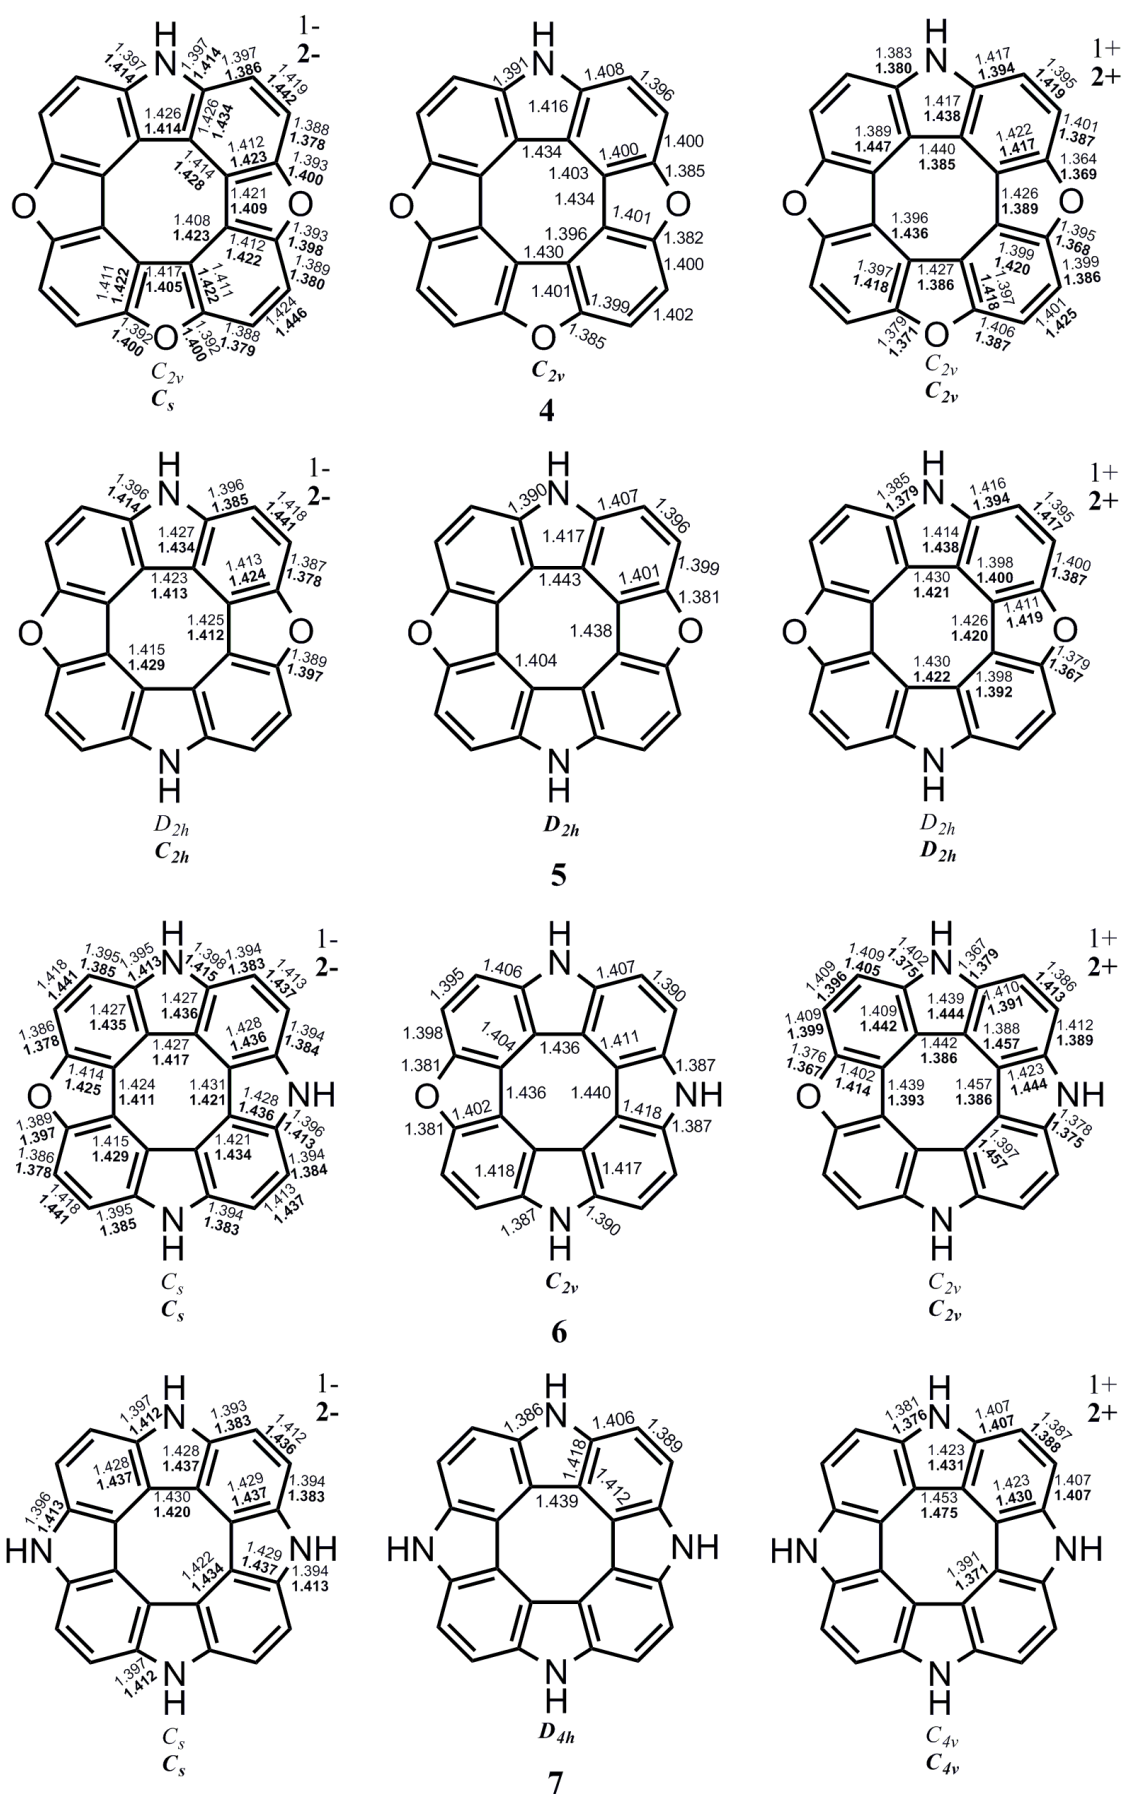

**Figure S3.** The bond lengths (Å) for the ground state of the molecules 4-7 and for their charged ions, calculated at the B3LYP/6-31+G(d) level of theory

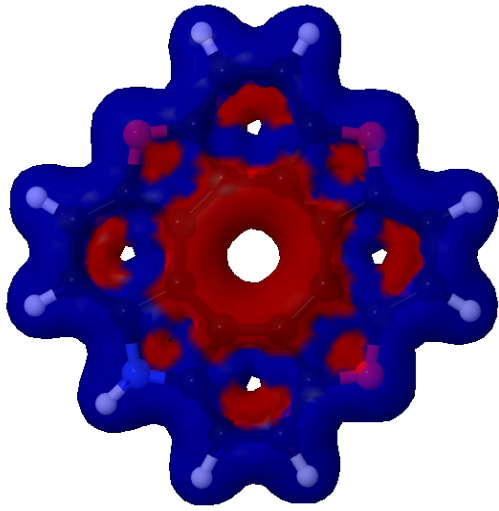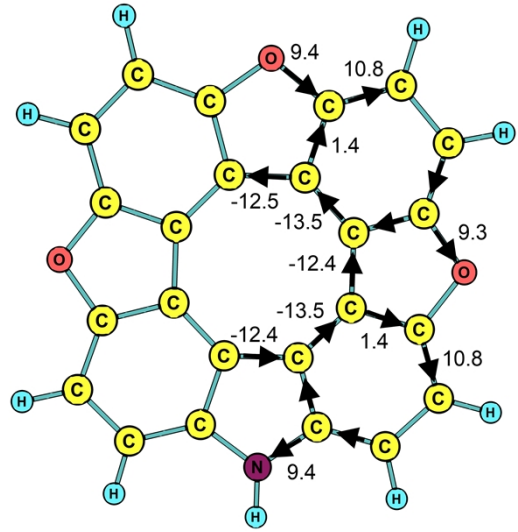

4

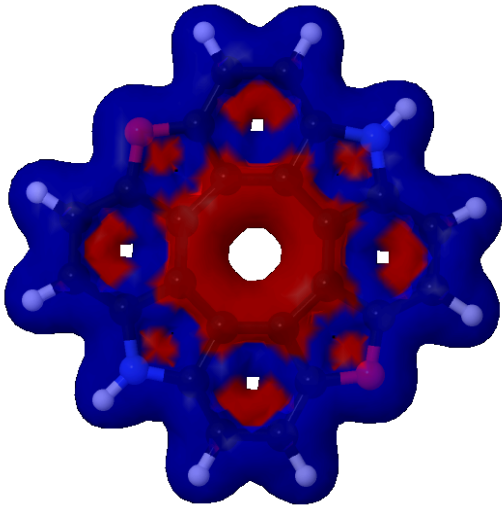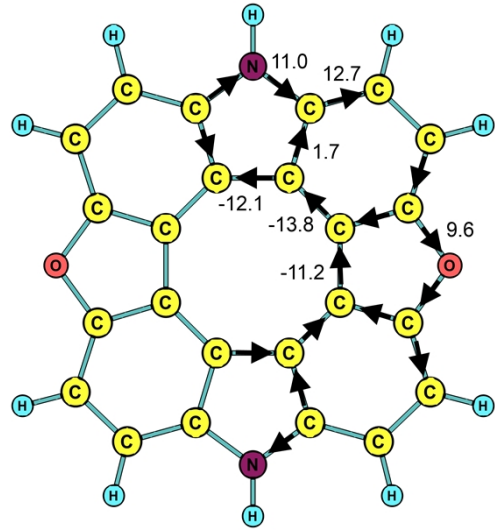

5

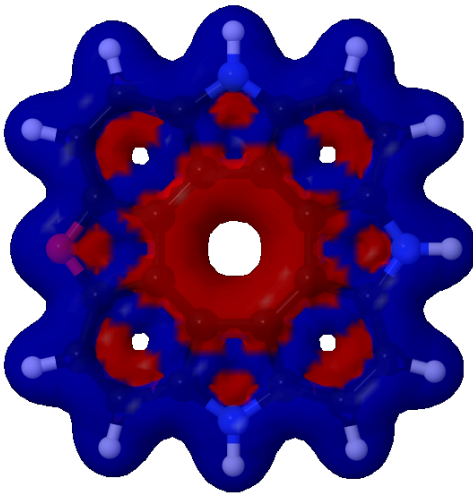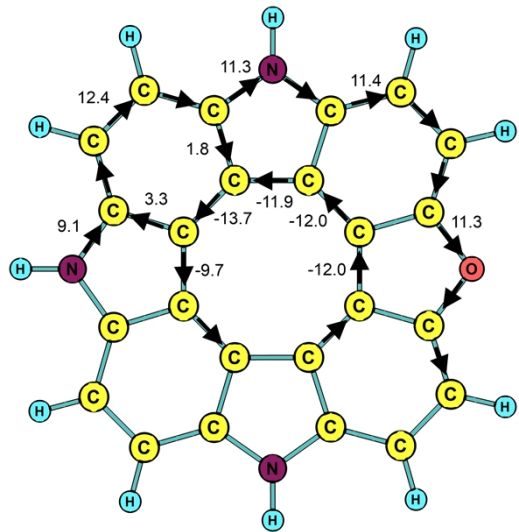

6

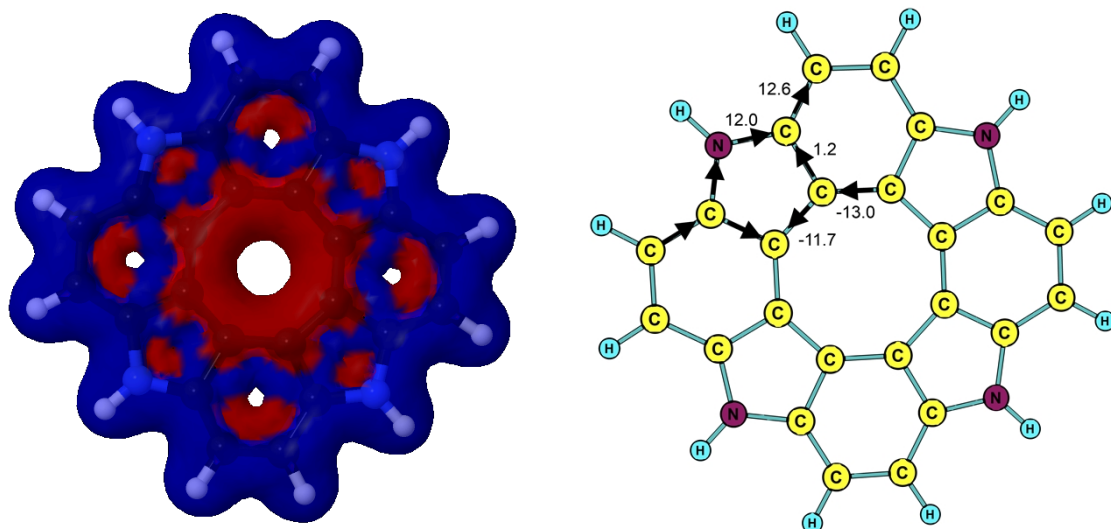

7

**Figure S4.** The ring-current densities (right) and ring-current strengths (right, in  $\text{nA}\cdot\text{T}^{-1}$ ) in hetero[8]circulenes 4–7 molecules (red and blue colours denote the paratropic and diatropic ring currents, respectively).

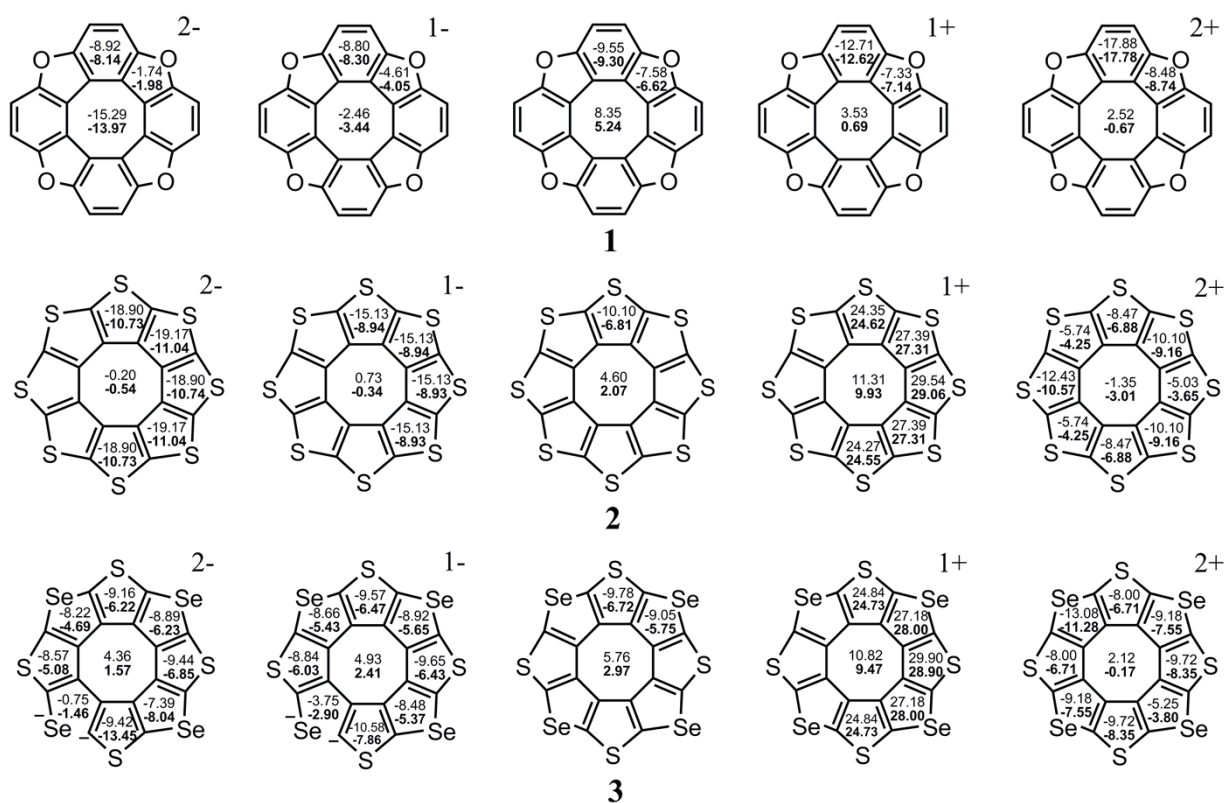

**Figure S5.** The NICS(0) (top number) and NICS (1) (bottom number in bold) indexes for the ground state of the molecules **1-3** and their ions calculated at the GIAO B3LYP/6-311++G(d,p) level of theory.

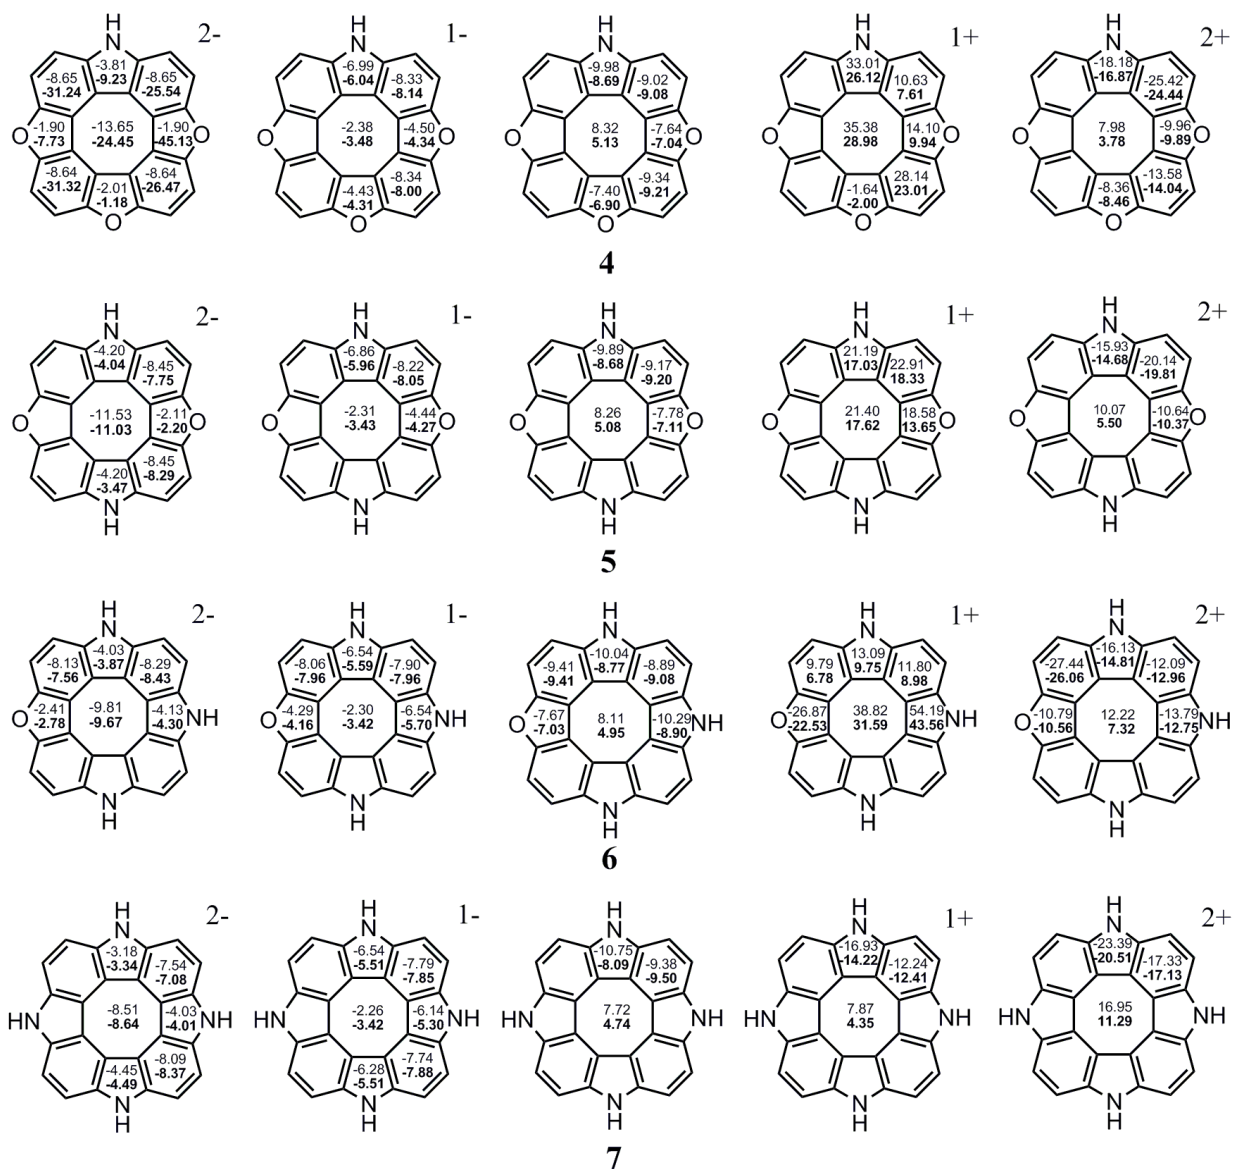

**Figure S6.** The NICS(0) (top number) and NICS (1) (bottom number in bold) indexes for the ground state of the molecules **4-7** and their ions calculated at the GIAO B3LYP/6-311++G(d,p) level of theory.



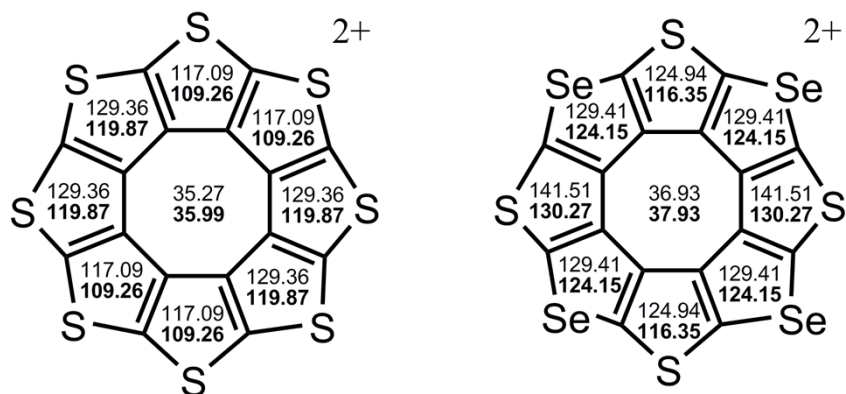

**Figure S7.** NICS(0) (top number) and NICS(1) (bottom number in bold) indexes, calculated for the singlet state dicationic of the compounds **2** and **3** at the GIAO B3LYP/6-311++G(d,p) level of theory.

**Table S1.** The optimized Cartesian coordinates of the compound **1** calculated at the B3LYP/6–31+G(d) level of theory

| Center Number | Atomic Number | Coordinates (Angstroms) |           |          |
|---------------|---------------|-------------------------|-----------|----------|
|               |               | X                       | Y         | Z        |
| 1             | 6             | -0.939892               | 4.119326  | 0.000000 |
| 2             | 6             | -2.236788               | 3.584554  | 0.000000 |
| 3             | 6             | -2.388164               | 2.192346  | 0.000000 |
| 4             | 6             | -1.297308               | 1.314881  | 0.000000 |
| 5             | 6             | -0.006540               | 1.847127  | 0.000000 |
| 6             | 6             | 0.148785                | 3.238452  | 0.000000 |
| 7             | 8             | 1.490579                | 3.582420  | 0.000000 |
| 8             | 6             | 2.192346                | 2.388164  | 0.000000 |
| 9             | 6             | 1.314881                | 1.297308  | 0.000000 |
| 10            | 6             | 3.584554                | 2.236788  | 0.000000 |
| 11            | 6             | 4.119326                | 0.939892  | 0.000000 |
| 12            | 1             | -0.786271               | 5.192879  | 0.000000 |
| 13            | 1             | -3.102454               | 4.237806  | 0.000000 |
| 14            | 1             | 4.237806                | 3.102454  | 0.000000 |
| 15            | 1             | 5.192879                | 0.786271  | 0.000000 |
| 16            | 6             | 1.847127                | 0.006540  | 0.000000 |
| 17            | 6             | 3.238452                | -0.148785 | 0.000000 |
| 18            | 8             | 3.582420                | -1.490579 | 0.000000 |
| 19            | 6             | 2.388164                | -2.192346 | 0.000000 |
| 20            | 6             | 1.297308                | -1.314881 | 0.000000 |
| 21            | 6             | 2.236788                | -3.584554 | 0.000000 |
| 22            | 6             | 0.939892                | -4.119326 | 0.000000 |
| 23            | 1             | 3.102454                | -4.237806 | 0.000000 |
| 24            | 1             | 0.786271                | -5.192879 | 0.000000 |
| 25            | 6             | 0.006540                | -1.847127 | 0.000000 |
| 26            | 6             | -0.148785               | -3.238452 | 0.000000 |
| 27            | 8             | -1.490579               | -3.582420 | 0.000000 |
| 28            | 6             | -2.192346               | -2.388164 | 0.000000 |
| 29            | 6             | -1.314881               | -1.297308 | 0.000000 |
| 30            | 6             | -3.584554               | -2.236788 | 0.000000 |
| 31            | 6             | -4.119326               | -0.939892 | 0.000000 |
| 32            | 6             | -3.238452               | 0.148785  | 0.000000 |
| 33            | 6             | -1.847127               | -0.006540 | 0.000000 |
| 34            | 1             | -4.237806               | -3.102454 | 0.000000 |
| 35            | 1             | -5.192879               | -0.786271 | 0.000000 |
| 36            | 8             | -3.582420               | 1.490579  | 0.000000 |

**Table S2.** The optimized Cartesian coordinates for the anion of the compound **1** calculated at the B3LYP/6–31+G(d) level of theory

| Center Number | Atomic Number | Coordinates (Angstroms) |           |          |
|---------------|---------------|-------------------------|-----------|----------|
|               |               | X                       | Y         | Z        |
| 1             | 6             | -0.545213               | 4.195156  | 0.000000 |
| 2             | 6             | -1.906819               | 3.776325  | 0.000000 |
| 3             | 6             | -2.179256               | 2.414492  | 0.000000 |
| 4             | 6             | -1.174616               | 1.424335  | 0.000000 |
| 5             | 6             | 0.171040                | 1.838260  | 0.000000 |
| 6             | 6             | 0.445508                | 3.221870  | 0.000000 |
| 7             | 8             | 1.821243                | 3.439427  | 0.000000 |
| 8             | 6             | 2.414492                | 2.179256  | 0.000000 |
| 9             | 6             | 1.424335                | 1.174616  | 0.000000 |
| 10            | 6             | 3.776325                | 1.906819  | 0.000000 |
| 11            | 6             | 4.195156                | 0.545213  | 0.000000 |
| 12            | 1             | -0.291859               | 5.249862  | 0.000000 |
| 13            | 1             | -2.709143               | 4.506304  | 0.000000 |
| 14            | 1             | 4.506304                | 2.709143  | 0.000000 |
| 15            | 1             | 5.249862                | 0.291859  | 0.000000 |
| 16            | 6             | 1.838260                | -0.171040 | 0.000000 |
| 17            | 6             | 3.221870                | -0.445508 | 0.000000 |
| 18            | 8             | 3.439427                | -1.821243 | 0.000000 |
| 19            | 6             | 2.179256                | -2.414492 | 0.000000 |
| 20            | 6             | 1.174616                | -1.424335 | 0.000000 |
| 21            | 6             | 1.906819                | -3.776325 | 0.000000 |

|    |   |           |           |          |
|----|---|-----------|-----------|----------|
| 22 | 6 | 0.545213  | -4.195156 | 0.000000 |
| 23 | 1 | 2.709143  | -4.506304 | 0.000000 |
| 24 | 1 | 0.291859  | -5.249862 | 0.000000 |
| 25 | 6 | -0.171040 | -1.838260 | 0.000000 |
| 26 | 6 | -0.445508 | -3.221870 | 0.000000 |
| 27 | 8 | -1.821243 | -3.439427 | 0.000000 |
| 28 | 6 | -2.414492 | -2.179256 | 0.000000 |
| 29 | 6 | -1.424335 | -1.174616 | 0.000000 |
| 30 | 6 | -3.776325 | -1.906819 | 0.000000 |
| 31 | 6 | -4.195156 | -0.545213 | 0.000000 |
| 32 | 6 | -3.221870 | 0.445508  | 0.000000 |
| 33 | 6 | -1.838260 | 0.171040  | 0.000000 |
| 34 | 1 | -4.506304 | -2.709143 | 0.000000 |
| 35 | 1 | -5.249862 | -0.291859 | 0.000000 |
| 36 | 8 | -3.439427 | 1.821243  | 0.000000 |

**Table S3.** The optimized Cartesian coordinates for the dianion of the compound **1** calculated at the B3LYP/6-31+G(d) level of theory

| Center<br>Number | Atomic<br>Number | Coordinates (Angstroms) |           |          |
|------------------|------------------|-------------------------|-----------|----------|
|                  |                  | X                       | Y         | Z        |
| 1                | 6                | 1.135431                | 4.085830  | 0.000000 |
| 2                | 6                | -0.304573               | 4.229709  | 0.000000 |
| 3                | 6                | -1.074265               | 3.083790  | 0.000000 |
| 4                | 6                | -0.538535               | 1.767503  | 0.000000 |
| 5                | 6                | 0.877602                | 1.626008  | 0.000000 |
| 6                | 6                | 1.663178                | 2.810275  | 0.000000 |
| 7                | 8                | 3.022959                | 2.473749  | 0.000000 |
| 8                | 6                | 3.083790                | 1.074265  | 0.000000 |
| 9                | 6                | 1.767503                | 0.538535  | 0.000000 |
| 10               | 6                | 4.229709                | 0.304573  | 0.000000 |
| 11               | 6                | 4.085830                | -1.135431 | 0.000000 |
| 12               | 1                | 1.779306                | 4.961166  | 0.000000 |
| 13               | 1                | -0.762527               | 5.215137  | 0.000000 |
| 14               | 1                | 5.215137                | 0.762527  | 0.000000 |
| 15               | 1                | 4.961166                | -1.779306 | 0.000000 |
| 16               | 6                | 1.626008                | -0.877602 | 0.000000 |
| 17               | 6                | 2.810275                | -1.663178 | 0.000000 |
| 18               | 8                | 2.473749                | -3.022959 | 0.000000 |
| 19               | 6                | 1.074265                | -3.083790 | 0.000000 |
| 20               | 6                | 0.538535                | -1.767503 | 0.000000 |
| 21               | 6                | 0.304573                | -4.229709 | 0.000000 |
| 22               | 6                | -1.135431               | -4.085830 | 0.000000 |
| 23               | 1                | 0.762527                | -5.215137 | 0.000000 |
| 24               | 1                | -1.779306               | -4.961166 | 0.000000 |
| 25               | 6                | -0.877602               | -1.626008 | 0.000000 |
| 26               | 6                | -1.663178               | -2.810275 | 0.000000 |
| 27               | 8                | -3.022959               | -2.473749 | 0.000000 |
| 28               | 6                | -3.083790               | -1.074265 | 0.000000 |
| 29               | 6                | -1.767503               | -0.538535 | 0.000000 |
| 30               | 6                | -4.229709               | -0.304573 | 0.000000 |
| 31               | 6                | -4.085830               | 1.135431  | 0.000000 |
| 32               | 6                | -2.810275               | 1.663178  | 0.000000 |
| 33               | 6                | -1.626008               | 0.877602  | 0.000000 |
| 34               | 1                | -5.215137               | -0.762527 | 0.000000 |
| 35               | 1                | -4.961166               | 1.779306  | 0.000000 |
| 36               | 8                | -2.473749               | 3.022959  | 0.000000 |

**Table S4.** The optimized Cartesian coordinates for the cation of the compound **1** calculated at the B3LYP/6–31+G(d) level of theory

| Center Number | Atomic Number | Coordinates (Angstroms) |           |          |
|---------------|---------------|-------------------------|-----------|----------|
|               |               | X                       | Y         | Z        |
| 1             | 6             | 2.959032                | 3.006524  | 0.000000 |
| 2             | 6             | 1.799538                | 3.815326  | 0.000000 |
| 3             | 6             | 0.549136                | 3.201734  | 0.000000 |
| 4             | 6             | 0.394246                | 1.801199  | 0.000000 |
| 5             | 6             | 1.554198                | 0.992077  | 0.000000 |
| 6             | 6             | 2.815055                | 1.621146  | 0.000000 |
| 7             | 8             | 3.822028                | 0.680970  | 0.000000 |
| 8             | 6             | 3.201734                | -0.549136 | 0.000000 |
| 9             | 6             | 1.801199                | -0.394246 | 0.000000 |
| 10            | 6             | 3.815326                | -1.799538 | 0.000000 |
| 11            | 6             | 3.006524                | -2.959032 | 0.000000 |
| 12            | 1             | 3.941967                | 3.463228  | 0.000000 |
| 13            | 1             | 1.888657                | 4.895511  | 0.000000 |
| 14            | 1             | 4.895511                | -1.888657 | 0.000000 |
| 15            | 1             | 3.463228                | -3.941967 | 0.000000 |
| 16            | 6             | 0.992077                | -1.554198 | 0.000000 |
| 17            | 6             | 1.621146                | -2.815055 | 0.000000 |
| 18            | 8             | 0.680970                | -3.822028 | 0.000000 |
| 19            | 6             | -0.549136               | -3.201734 | 0.000000 |
| 20            | 6             | -0.394246               | -1.801199 | 0.000000 |
| 21            | 6             | -1.799538               | -3.815326 | 0.000000 |
| 22            | 6             | -2.959032               | -3.006524 | 0.000000 |
| 23            | 1             | -1.888657               | -4.895511 | 0.000000 |
| 24            | 1             | -3.941967               | -3.463228 | 0.000000 |
| 25            | 6             | -1.554198               | -0.992077 | 0.000000 |
| 26            | 6             | -2.815055               | -1.621146 | 0.000000 |
| 27            | 8             | -3.822028               | -0.680970 | 0.000000 |
| 28            | 6             | -3.201734               | 0.549136  | 0.000000 |
| 29            | 6             | -1.801199               | 0.394246  | 0.000000 |
| 30            | 6             | -3.815326               | 1.799538  | 0.000000 |
| 31            | 6             | -3.006524               | 2.959032  | 0.000000 |
| 32            | 6             | -1.621146               | 2.815055  | 0.000000 |
| 33            | 6             | -0.992077               | 1.554198  | 0.000000 |
| 34            | 1             | -4.895511               | 1.888657  | 0.000000 |
| 35            | 1             | -3.463228               | 3.941967  | 0.000000 |
| 36            | 8             | -0.680970               | 3.822028  | 0.000000 |

**Table S5.** The optimized Cartesian coordinates for the dication of the compound **1** calculated at the B3LYP/6–31+G(d) level of theory

| Center Number | Atomic Number | Coordinates (Angstroms) |           |          |
|---------------|---------------|-------------------------|-----------|----------|
|               |               | X                       | Y         | Z        |
| 1             | 6             | 2.950140                | 3.014012  | 0.000000 |
| 2             | 6             | 1.776573                | 3.825099  | 0.000000 |
| 3             | 6             | 0.529888                | 3.215537  | 0.000000 |
| 4             | 6             | 0.374579                | 1.806162  | 0.000000 |
| 5             | 6             | 1.557142                | 0.988858  | 0.000000 |
| 6             | 6             | 2.820625                | 1.632341  | 0.000000 |
| 7             | 8             | 3.824294                | 0.698475  | 0.000000 |
| 8             | 6             | 3.215537                | -0.529888 | 0.000000 |
| 9             | 6             | 1.806162                | -0.374579 | 0.000000 |
| 10            | 6             | 3.825099                | -1.776573 | 0.000000 |
| 11            | 6             | 3.014012                | -2.950140 | 0.000000 |
| 12            | 1             | 3.928720                | 3.482355  | 0.000000 |
| 13            | 1             | 1.868759                | 4.906055  | 0.000000 |
| 14            | 1             | 4.906055                | -1.868759 | 0.000000 |
| 15            | 1             | 3.482355                | -3.928720 | 0.000000 |
| 16            | 6             | 0.988858                | -1.557142 | 0.000000 |
| 17            | 6             | 1.632341                | -2.820625 | 0.000000 |
| 18            | 8             | 0.698475                | -3.824294 | 0.000000 |
| 19            | 6             | -0.529888               | -3.215537 | 0.000000 |
| 20            | 6             | -0.374579               | -1.806162 | 0.000000 |
| 21            | 6             | -1.776573               | -3.825099 | 0.000000 |
| 22            | 6             | -2.950140               | -3.014012 | 0.000000 |

|    |   |           |           |          |
|----|---|-----------|-----------|----------|
| 23 | 1 | -1.868759 | -4.906055 | 0.000000 |
| 24 | 1 | -3.928720 | -3.482355 | 0.000000 |
| 25 | 6 | -1.557142 | -0.988858 | 0.000000 |
| 26 | 6 | -2.820625 | -1.632341 | 0.000000 |
| 27 | 8 | -3.824294 | -0.698475 | 0.000000 |
| 28 | 6 | -3.215537 | 0.529888  | 0.000000 |
| 29 | 6 | -1.806162 | 0.374579  | 0.000000 |
| 30 | 6 | -3.825099 | 1.776573  | 0.000000 |
| 31 | 6 | -3.014012 | 2.950140  | 0.000000 |
| 32 | 6 | -1.632341 | 2.820625  | 0.000000 |
| 33 | 6 | -0.988858 | 1.557142  | 0.000000 |
| 34 | 1 | -4.906055 | 1.868759  | 0.000000 |
| 35 | 1 | -3.482355 | 3.928720  | 0.000000 |
| 36 | 8 | -0.698475 | 3.824294  | 0.000000 |

**Table S6.** The optimized Cartesian coordinates of the compound **2** calculated at the B3LYP/6-31+G(d) level of theory

| Center Number | Atomic Number | Coordinates (Angstroms) |           |          |
|---------------|---------------|-------------------------|-----------|----------|
|               |               | X                       | Y         | Z        |
| 1             | 16            | 3.007081                | -3.007081 | 0.000000 |
| 2             | 6             | -0.712573               | 1.720303  | 0.000000 |
| 3             | 6             | 0.712573                | 1.720303  | 0.000000 |
| 4             | 6             | -1.720303               | -0.712573 | 0.000000 |
| 5             | 6             | -1.720303               | 0.712573  | 0.000000 |
| 6             | 6             | 1.720303                | 0.712573  | 0.000000 |
| 7             | 6             | 1.720303                | -0.712573 | 0.000000 |
| 8             | 6             | -0.712573               | -1.720303 | 0.000000 |
| 9             | 16            | -3.007081               | 3.007081  | 0.000000 |
| 10            | 16            | 0.000000                | 4.252655  | 0.000000 |
| 11            | 16            | 3.007081                | 3.007081  | 0.000000 |
| 12            | 16            | 4.252655                | 0.000000  | 0.000000 |
| 13            | 16            | -3.007081               | -3.007081 | 0.000000 |
| 14            | 16            | -4.252655               | 0.000000  | 0.000000 |
| 15            | 6             | -2.996866               | -1.241342 | 0.000000 |
| 16            | 6             | -2.996866               | 1.241342  | 0.000000 |
| 17            | 6             | -1.241342               | 2.996866  | 0.000000 |
| 18            | 6             | 1.241342                | 2.996866  | 0.000000 |
| 19            | 6             | 2.996866                | 1.241342  | 0.000000 |
| 20            | 6             | 2.996866                | -1.241342 | 0.000000 |
| 21            | 6             | -1.241342               | -2.996866 | 0.000000 |
| 22            | 6             | 0.712573                | -1.720303 | 0.000000 |
| 23            | 6             | 1.241342                | -2.996866 | 0.000000 |
| 24            | 16            | 0.000000                | -4.252655 | 0.000000 |

**Table S7.** The optimized Cartesian coordinates for the anion of the compound **2** calculated at the B3LYP/6-31+G(d) level of theory

| Center Number | Atomic Number | Coordinates (Angstroms) |           |           |
|---------------|---------------|-------------------------|-----------|-----------|
|               |               | X                       | Y         | Z         |
| 1             | 6             | 1.320983                | 1.333060  | -0.277357 |
| 2             | 6             | 2.290951                | 2.311936  | -0.081585 |
| 3             | 6             | -0.008442               | 1.876498  | -0.277051 |
| 4             | 6             | -0.014665               | 3.254412  | -0.080590 |
| 5             | 6             | -1.876310               | -0.008576 | -0.275631 |
| 6             | 6             | -1.332743               | 1.320828  | -0.277039 |
| 7             | 6             | -3.253937               | -0.014887 | -0.077773 |
| 8             | 6             | -2.311533               | 2.290638  | -0.080846 |
| 9             | 16            | -1.642584               | 3.914872  | 0.133252  |
| 10            | 16            | 1.606697                | 3.930017  | 0.132832  |
| 11            | 16            | -3.929272               | 1.607052  | 0.134861  |
| 12            | 6             | 1.332743                | -1.320828 | -0.277039 |
| 13            | 6             | 1.876310                | 0.008576  | -0.275631 |
| 14            | 6             | 3.253937                | 0.014887  | -0.077773 |
| 15            | 6             | 2.311533                | -2.290638 | -0.080846 |

|    |    |           |           |           |
|----|----|-----------|-----------|-----------|
| 16 | 16 | 3.929272  | -1.607052 | 0.134861  |
| 17 | 6  | 0.014665  | -3.254412 | -0.080590 |
| 18 | 6  | 0.008442  | -1.876498 | -0.277051 |
| 19 | 16 | 1.642584  | -3.914872 | 0.133252  |
| 20 | 6  | -1.320983 | -1.333060 | -0.277357 |
| 21 | 6  | -2.290951 | -2.311936 | -0.081585 |
| 22 | 16 | -1.606697 | -3.930017 | 0.132832  |
| 23 | 16 | -3.914789 | -1.642360 | 0.134507  |
| 24 | 16 | 3.914789  | 1.642360  | 0.134507  |

**Table S8.** The optimized Cartesian coordinates for the dianion of the compound **2** calculated at the B3LYP/6-31+G(d) level of theory

| Center Number | Atomic Number | Coordinates (Angstroms) |           |           |
|---------------|---------------|-------------------------|-----------|-----------|
|               |               | X                       | Y         | Z         |
| 1             | 6             | 0.348649                | -1.743095 | 0.722012  |
| 2             | 6             | 0.119633                | -3.017955 | 1.250074  |
| 3             | 6             | 0.348681                | -0.722019 | 1.743185  |
| 4             | 6             | 0.120115                | -1.250169 | 3.018131  |
| 5             | 6             | 0.348706                | 1.742983  | 0.721974  |
| 6             | 6             | 0.348643                | 0.721962  | 1.743171  |
| 7             | 6             | 0.119768                | 3.017870  | 1.250039  |
| 8             | 6             | 0.119999                | 1.250057  | 3.018115  |
| 9             | 16            | -0.175690               | 0.000034  | 4.244001  |
| 10            | 16            | -0.175144               | -3.001439 | 3.000951  |
| 11            | 16            | -0.175634               | 3.001497  | 3.000708  |
| 12            | 6             | 0.348681                | -0.722019 | -1.743185 |
| 13            | 6             | 0.348649                | -1.743095 | -0.722012 |
| 14            | 6             | 0.119633                | -3.017955 | -1.250074 |
| 15            | 6             | 0.120115                | -1.250169 | -3.018131 |
| 16            | 16            | -0.175144               | -3.001439 | -3.000951 |
| 17            | 6             | 0.119999                | 1.250057  | -3.018115 |
| 18            | 6             | 0.348643                | 0.721962  | -1.743171 |
| 19            | 16            | -0.175690               | 0.000034  | -4.244001 |
| 20            | 6             | 0.348706                | 1.742983  | -0.721974 |
| 21            | 6             | 0.119768                | 3.017870  | -1.250039 |
| 22            | 16            | -0.175634               | 3.001497  | -3.000708 |
| 23            | 16            | -0.176024               | 4.243990  | 0.000000  |
| 24            | 16            | -0.176684               | -4.243899 | 0.000000  |

**Table S9.** The optimized Cartesian coordinates for the cation of the compound **2** calculated at the B3LYP/6-31+G(d) level of theory

| Center Number | Atomic Number | Coordinates (Angstroms) |           |           |
|---------------|---------------|-------------------------|-----------|-----------|
|               |               | X                       | Y         | Z         |
| 1             | 6             | 0.000000                | 0.711385  | 1.706366  |
| 2             | 6             | 0.000000                | -0.711385 | 1.706366  |
| 3             | 6             | 0.000000                | -1.712594 | 0.704744  |
| 4             | 6             | 0.000000                | -1.712581 | -0.704644 |
| 5             | 6             | 0.000000                | -0.711380 | -1.706365 |
| 6             | 6             | 0.000000                | 0.711380  | -1.706365 |
| 7             | 6             | 0.000000                | 1.712581  | -0.704644 |
| 8             | 6             | 0.000000                | 1.712594  | 0.704744  |
| 9             | 6             | 0.000000                | 1.238929  | 2.985036  |
| 10            | 6             | 0.000000                | -1.238929 | 2.985036  |
| 11            | 6             | 0.000000                | -3.003378 | 1.241120  |
| 12            | 6             | 0.000000                | -3.003620 | -1.240895 |
| 13            | 6             | 0.000000                | -1.239218 | -2.984976 |
| 14            | 6             | 0.000000                | 1.239218  | -2.984976 |
| 15            | 6             | 0.000000                | 3.003620  | -1.240895 |
| 16            | 6             | 0.000000                | 3.003378  | 1.241120  |
| 17            | 16            | 0.000000                | -4.267208 | -0.000056 |
| 18            | 16            | 0.000000                | -3.016898 | -2.989799 |
| 19            | 16            | 0.000000                | 0.000000  | -4.227568 |
| 20            | 16            | 0.000000                | 3.016898  | -2.989799 |

|    |    |          |           |           |
|----|----|----------|-----------|-----------|
| 21 | 16 | 0.000000 | 4.267208  | -0.000056 |
| 22 | 16 | 0.000000 | 3.016656  | 2.989734  |
| 23 | 16 | 0.000000 | 0.000000  | 4.227519  |
| 24 | 16 | 0.000000 | -3.016656 | 2.989734  |

**Table S10.** The optimized Cartesian coordinates for the singlet state dication of the compound **2** calculated at the B3LYP/6–31+G(d) level of theory

| Center Number | Atomic Number | Coordinates (Angstroms) |           |           |
|---------------|---------------|-------------------------|-----------|-----------|
|               |               | X                       | Y         | Z         |
| 1             | 6             | 0.000000                | 1.836672  | 0.000058  |
| 2             | 6             | 1.309854                | 1.293964  | 0.000047  |
| 3             | 6             | -1.309854               | 1.293964  | 0.000047  |
| 4             | 6             | 0.000000                | 3.215795  | 0.000038  |
| 5             | 6             | 2.293816                | 2.286017  | -0.000026 |
| 6             | 6             | -2.293816               | 2.286017  | -0.000026 |
| 7             | 16            | -3.959247               | 1.605746  | 0.000003  |
| 8             | 16            | -1.638791               | 3.887277  | -0.000046 |
| 9             | 16            | 1.638791                | 3.887277  | -0.000046 |
| 10            | 16            | 3.959247                | 1.605746  | 0.000003  |
| 11            | 6             | -3.267153               | 0.000000  | 0.000080  |
| 12            | 6             | -1.846330               | 0.000000  | 0.000013  |
| 13            | 6             | 1.309854                | -1.293964 | 0.000047  |
| 14            | 6             | 0.000000                | -1.836672 | 0.000058  |
| 15            | 6             | -1.309854               | -1.293964 | 0.000047  |
| 16            | 6             | 2.293816                | -2.286017 | -0.000026 |
| 17            | 6             | 0.000000                | -3.215795 | 0.000038  |
| 18            | 6             | -2.293816               | -2.286017 | -0.000026 |
| 19            | 16            | 3.959247                | -1.605746 | 0.000003  |
| 20            | 16            | 1.638791                | -3.887277 | -0.000046 |
| 21            | 16            | -1.638791               | -3.887277 | -0.000046 |
| 22            | 16            | -3.959247               | -1.605746 | 0.000003  |
| 23            | 6             | 1.846330                | 0.000000  | 0.000013  |
| 24            | 6             | 3.267153                | 0.000000  | 0.000080  |

**Table S11.** The optimized Cartesian coordinates for the triplet state dication of the compound **2** calculated at the B3LYP/6–31+G(d) level of theory

| Center Number | Atomic Number | Coordinates (Angstroms) |           |           |
|---------------|---------------|-------------------------|-----------|-----------|
|               |               | X                       | Y         | Z         |
| 1             | 6             | 0.000000                | 0.699457  | 1.703110  |
| 2             | 6             | 0.000000                | -0.699457 | 1.703110  |
| 3             | 6             | 0.000000                | -1.702966 | 0.702959  |
| 4             | 6             | 0.000000                | -1.699918 | -0.706635 |
| 5             | 6             | 0.000000                | -0.709908 | -1.699562 |
| 6             | 6             | 0.000000                | 0.709908  | -1.699562 |
| 7             | 6             | 0.000000                | 1.699918  | -0.706635 |
| 8             | 6             | 0.000000                | 1.702966  | 0.702959  |
| 9             | 6             | 0.000000                | 1.237247  | 3.000327  |
| 10            | 6             | 0.000000                | -1.237247 | 3.000327  |
| 11            | 6             | 0.000000                | -2.983874 | 1.233983  |
| 12            | 6             | 0.000000                | -3.004121 | -1.246655 |
| 13            | 6             | 0.000000                | -1.242955 | -2.987558 |
| 14            | 6             | 0.000000                | 1.242955  | -2.987558 |
| 15            | 6             | 0.000000                | 3.004121  | -1.246655 |
| 16            | 6             | 0.000000                | 2.983874  | 1.233983  |
| 17            | 16            | 0.000000                | -4.245084 | -0.011572 |
| 18            | 16            | 0.000000                | -3.014664 | -3.003132 |
| 19            | 16            | 0.000000                | 0.000000  | -4.230879 |
| 20            | 16            | 0.000000                | 3.014664  | -3.003132 |
| 21            | 16            | 0.000000                | 4.245084  | -0.011572 |
| 22            | 16            | 0.000000                | 2.987974  | 3.000604  |
| 23            | 16            | 0.000000                | 0.000000  | 4.259103  |
| 24            | 16            | 0.000000                | -2.987974 | 3.000604  |

**Table S12.** The optimized Cartesian coordinates of the compound **3** calculated at the B3LYP/6–31+G(d) level of theory

| Center Number | Atomic Number | Coordinates (Angstroms) |           |          |
|---------------|---------------|-------------------------|-----------|----------|
|               |               | X                       | Y         | Z        |
| 1             | 34            | 0.826039                | 4.328534  | 0.000000 |
| 2             | 34            | -4.328534               | 0.826039  | 0.000000 |
| 3             | 16            | -2.402075               | 3.535100  | 0.000000 |
| 4             | 16            | 3.535100                | 2.402075  | 0.000000 |
| 5             | 6             | -1.572462               | 1.033751  | 0.000000 |
| 6             | 6             | -0.382027               | 1.842643  | 0.000000 |
| 7             | 6             | -1.842643               | -0.382027 | 0.000000 |
| 8             | 6             | 1.816301                | 2.718288  | 0.000000 |
| 9             | 6             | -0.687620               | 3.196125  | 0.000000 |
| 10            | 6             | 1.033751                | 1.572462  | 0.000000 |
| 11            | 6             | -2.718288               | 1.816301  | 0.000000 |
| 12            | 6             | -3.196125               | -0.687620 | 0.000000 |
| 13            | 34            | -0.826039               | -4.328534 | 0.000000 |
| 14            | 34            | 4.328534                | -0.826039 | 0.000000 |
| 15            | 16            | 2.402075                | -3.535100 | 0.000000 |
| 16            | 16            | -3.535100               | -2.402075 | 0.000000 |
| 17            | 6             | 1.572462                | -1.033751 | 0.000000 |
| 18            | 6             | 0.382027                | -1.842643 | 0.000000 |
| 19            | 6             | 1.842643                | 0.382027  | 0.000000 |
| 20            | 6             | -1.816301               | -2.718288 | 0.000000 |
| 21            | 6             | 0.687620                | -3.196125 | 0.000000 |
| 22            | 6             | -1.033751               | -1.572462 | 0.000000 |
| 23            | 6             | 2.718288                | -1.816301 | 0.000000 |
| 24            | 6             | 3.196125                | 0.687620  | 0.000000 |

**Table S13.** The optimized Cartesian coordinates for the anion of the compound **3** calculated at the B3LYP/6–31+G(d) level of theory

| Center Number | Atomic Number | Coordinates (Angstroms) |           |           |
|---------------|---------------|-------------------------|-----------|-----------|
|               |               | X                       | Y         | Z         |
| 1             | 6             | -1.572531               | 1.127193  | 0.000151  |
| 2             | 6             | -0.339424               | 1.897298  | -0.000155 |
| 3             | 6             | -0.585380               | 3.271467  | -0.000219 |
| 4             | 6             | -2.729250               | 1.897900  | 0.000322  |
| 5             | 34            | -2.427545               | 3.752738  | 0.000093  |
| 6             | 6             | -3.278036               | -0.486092 | -0.000300 |
| 7             | 6             | -1.906231               | -0.275427 | -0.000113 |
| 8             | 16            | -4.219680               | 0.978927  | -0.000078 |
| 9             | 6             | -1.141916               | -1.496979 | 0.000122  |
| 10            | 6             | -1.929180               | -2.639777 | 0.000231  |
| 11            | 34            | -3.788457               | -2.305037 | -0.000169 |
| 12            | 6             | 1.094308                | 1.616657  | 0.000216  |
| 13            | 6             | 1.852792                | 2.781241  | 0.000318  |
| 14            | 6             | 1.867965                | 0.364451  | 0.000001  |
| 15            | 6             | 3.254419                | 0.513332  | -0.000220 |
| 16            | 6             | 0.265102                | -1.810290 | -0.000073 |
| 17            | 6             | 1.498350                | -1.042432 | 0.000268  |
| 18            | 6             | 0.452615                | -3.187869 | -0.000151 |
| 19            | 6             | 2.616769                | -1.871916 | 0.000336  |
| 20            | 34            | 2.255980                | -3.725197 | 0.000058  |
| 21            | 16            | 4.120348                | -1.014246 | 0.000007  |
| 22            | 34            | 4.179856                | 2.137313  | -0.000208 |
| 23            | 16            | -1.020193               | -4.126571 | 0.000148  |
| 24            | 16            | 0.869738                | 4.212745  | 0.000126  |



**Table S14.** The optimized Cartesian coordinates for the dianion of the compound **3** calculated at the B3LYP/6–31+G(d) level of theory

| Center Number | Atomic Number | Coordinates (Angstroms) |           |           |
|---------------|---------------|-------------------------|-----------|-----------|
|               |               | X                       | Y         | Z         |
| 1             | 6             | -2.854759               | -1.471335 | -0.233164 |
| 2             | 6             | -1.602949               | -0.874266 | -0.187137 |
| 3             | 6             | -0.539441               | -1.796884 | 0.137897  |
| 4             | 6             | -0.982554               | -3.094971 | 0.351146  |
| 5             | 34            | -2.849987               | -3.323319 | 0.155066  |
| 6             | 6             | 0.901348                | -1.695270 | 0.168269  |
| 7             | 6             | 1.837062                | -0.645866 | -0.210435 |
| 8             | 6             | 1.469057                | -2.947524 | 0.381005  |
| 9             | 6             | 3.106396                | -1.168781 | -0.491406 |
| 10            | 34            | 3.315100                | -3.007009 | 0.017657  |
| 11            | 16            | 0.300311                | -4.251686 | 0.584641  |
| 12            | 6             | -1.671714               | 0.555770  | -0.393007 |
| 13            | 6             | -0.727625               | 1.650884  | -0.218625 |
| 14            | 6             | -1.390212               | 2.870475  | -0.087471 |
| 15            | 6             | -2.994565               | 0.951590  | -0.574979 |
| 16            | 34            | -3.253058               | 2.813663  | -0.431378 |
| 17            | 6             | 0.718203                | 1.765979  | -0.071114 |
| 18            | 6             | 1.080915                | 3.045612  | 0.383418  |
| 19            | 6             | 1.771776                | 0.788605  | -0.479387 |
| 20            | 6             | 2.919503                | 1.320836  | -1.088042 |
| 21            | 34            | 2.630404                | 3.830302  | 1.080073  |
| 22            | 16            | -0.322930               | 4.158986  | 0.344682  |
| 23            | 16            | 4.130139                | 0.060477  | -1.172940 |
| 24            | 16            | -4.162912               | -0.354827 | -0.522009 |

**Table S15.** The optimized Cartesian coordinates for the cation of the compound **3** calculated at the B3LYP/6–31+G(d) level of theory

| Center Number | Atomic Number | Coordinates (Angstroms) |           |          |
|---------------|---------------|-------------------------|-----------|----------|
|               |               | X                       | Y         | Z        |
| 1             | 6             | -0.718332               | 1.723486  | 0.000000 |
| 2             | 6             | -1.730776               | 0.711265  | 0.000000 |
| 3             | 6             | -1.224655               | 3.016255  | 0.000000 |
| 4             | 16            | 0.000000                | 4.247616  | 0.000000 |
| 5             | 34            | -3.124545               | 3.097251  | 0.000000 |
| 6             | 6             | -3.036223               | 1.225947  | 0.000000 |
| 7             | 16            | -4.286682               | 0.000000  | 0.000000 |
| 8             | 6             | 1.730776                | 0.711265  | 0.000000 |
| 9             | 6             | 0.718332                | 1.723486  | 0.000000 |
| 10            | 6             | 3.036223                | 1.225947  | 0.000000 |
| 11            | 34            | 3.124545                | 3.097251  | 0.000000 |
| 12            | 6             | 1.224655                | 3.016255  | 0.000000 |
| 13            | 6             | -1.730776               | -0.711265 | 0.000000 |
| 14            | 6             | -0.718332               | -1.723486 | 0.000000 |
| 15            | 6             | -3.036223               | -1.225947 | 0.000000 |
| 16            | 34            | -3.124545               | -3.097251 | 0.000000 |
| 17            | 6             | -1.224655               | -3.016255 | 0.000000 |
| 18            | 6             | 0.718332                | -1.723486 | 0.000000 |
| 19            | 6             | 1.730776                | -0.711265 | 0.000000 |
| 20            | 6             | 1.224655                | -3.016255 | 0.000000 |
| 21            | 6             | 3.036223                | -1.225947 | 0.000000 |
| 22            | 16            | 4.286682                | 0.000000  | 0.000000 |
| 23            | 34            | 3.124545                | -3.097251 | 0.000000 |
| 24            | 16            | 0.000000                | -4.247616 | 0.000000 |

**Table S16.** The optimized Cartesian coordinates for the dication singlet state of the compound **3** calculated at the B3LYP/6–31+G(d) level of theory

| Center Number | Atomic Number | Coordinates (Angstroms) |           |          |
|---------------|---------------|-------------------------|-----------|----------|
|               |               | X                       | Y         | Z        |
| 1             | 6             | -0.717425               | 1.712223  | 0.000000 |
| 2             | 6             | -1.725595               | 0.704803  | 0.000000 |
| 3             | 6             | -1.221850               | 3.006633  | 0.000000 |
| 4             | 16            | 0.000000                | 4.229200  | 0.000000 |
| 5             | 34            | -3.137788               | 3.079804  | 0.000000 |
| 6             | 6             | -3.044985               | 1.226363  | 0.000000 |
| 7             | 16            | -4.302173               | 0.000000  | 0.000000 |
| 8             | 6             | 1.725595                | 0.704803  | 0.000000 |
| 9             | 6             | 0.717425                | 1.712223  | 0.000000 |
| 10            | 6             | 3.044985                | 1.226363  | 0.000000 |
| 11            | 34            | 3.137788                | 3.079804  | 0.000000 |
| 12            | 6             | 1.221850                | 3.006633  | 0.000000 |
| 13            | 6             | -1.725595               | -0.704803 | 0.000000 |
| 14            | 6             | -0.717425               | -1.712223 | 0.000000 |
| 15            | 6             | -3.044985               | -1.226363 | 0.000000 |
| 16            | 34            | -3.137788               | -3.079804 | 0.000000 |
| 17            | 6             | -1.221850               | -3.006633 | 0.000000 |
| 18            | 6             | 0.717425                | -1.712223 | 0.000000 |
| 19            | 6             | 1.725595                | -0.704803 | 0.000000 |
| 20            | 6             | 1.221850                | -3.006633 | 0.000000 |
| 21            | 6             | 3.044985                | -1.226363 | 0.000000 |
| 22            | 16            | 4.302173                | 0.000000  | 0.000000 |
| 23            | 34            | 3.137788                | -3.079804 | 0.000000 |
| 24            | 16            | 0.000000                | -4.229200 | 0.000000 |

**Table S17.** The optimized Cartesian coordinates for the triplet state dication of the compound **3** calculated at the B3LYP/6–31+G(d) level of theory

| Center Number | Atomic Number | Coordinates (Angstroms) |           |           |
|---------------|---------------|-------------------------|-----------|-----------|
|               |               | X                       | Y         | Z         |
| 1             | 6             | 0.000000                | 0.707963  | 1.718852  |
| 2             | 6             | 0.000000                | -0.707963 | 1.718852  |
| 3             | 6             | 0.000000                | -1.718749 | 0.710454  |
| 4             | 6             | 0.000000                | -1.717184 | -0.714554 |
| 5             | 6             | 0.000000                | -0.716709 | -1.717203 |
| 6             | 6             | 0.000000                | 0.716709  | -1.717203 |
| 7             | 6             | 0.000000                | 1.717184  | -0.714554 |
| 8             | 6             | 0.000000                | 1.718749  | 0.710454  |
| 9             | 6             | 0.000000                | 1.270687  | 3.010316  |
| 10            | 6             | 0.000000                | -1.270687 | 3.010316  |
| 11            | 6             | 0.000000                | -2.997455 | 1.267751  |
| 12            | 6             | 0.000000                | -3.013326 | -1.278914 |
| 13            | 6             | 0.000000                | -1.275656 | -3.001368 |
| 14            | 6             | 0.000000                | 1.275656  | -3.001368 |
| 15            | 6             | 0.000000                | 3.013326  | -1.278914 |
| 16            | 6             | 0.000000                | 2.997455  | 1.267751  |
| 17            | 34            | 0.000000                | -4.396691 | -0.008694 |
| 18            | 16            | 0.000000                | -3.023882 | -3.017619 |
| 19            | 34            | 0.000000                | 0.000000  | -4.385603 |
| 20            | 16            | 0.000000                | 3.023882  | -3.017619 |
| 21            | 34            | 0.000000                | 4.396691  | -0.008694 |
| 22            | 16            | 0.000000                | 3.005745  | 3.013358  |
| 23            | 34            | 0.000000                | 0.000000  | 4.408647  |
| 24            | 16            | 0.000000                | -3.005745 | 3.013358  |

**Table S18.** The optimized Cartesian coordinates of the compound **4** calculated at the B3LYP/6–31+G(d) level of theory

| Center Number | Atomic Number | Coordinates (Angstroms) |           |           |
|---------------|---------------|-------------------------|-----------|-----------|
|               |               | X                       | Y         | Z         |
| 1             | 6             | 0.000000                | 0.714964  | 1.706034  |
| 2             | 6             | 0.000000                | 1.106024  | 3.050997  |
| 3             | 6             | 0.000000                | -1.106024 | 3.050997  |
| 4             | 6             | 0.000000                | -0.714964 | 1.706034  |
| 5             | 6             | 0.000000                | -1.699544 | 0.715783  |
| 6             | 6             | 0.000000                | -1.702407 | -0.718537 |
| 7             | 6             | 0.000000                | -3.051446 | -1.092868 |
| 8             | 6             | 0.000000                | -3.042586 | 1.115631  |
| 9             | 6             | 0.000000                | -0.717242 | -1.717996 |
| 10            | 6             | 0.000000                | 1.699544  | 0.715783  |
| 11            | 6             | 0.000000                | 1.702407  | -0.718537 |
| 12            | 6             | 0.000000                | 0.717242  | -1.717996 |
| 13            | 8             | 0.000000                | -3.880112 | 0.016753  |
| 14            | 8             | 0.000000                | 0.000000  | 3.884098  |
| 15            | 6             | 0.000000                | 3.042586  | 1.115631  |
| 16            | 6             | 0.000000                | 3.051446  | -1.092868 |
| 17            | 8             | 0.000000                | 3.880112  | 0.016753  |
| 18            | 6             | 0.000000                | -1.136853 | -3.070317 |
| 19            | 6             | 0.000000                | 1.136853  | -3.070317 |
| 20            | 6             | 0.000000                | -3.437959 | 2.458280  |
| 21            | 6             | 0.000000                | -2.447205 | 3.450118  |
| 22            | 6             | 0.000000                | -2.498611 | -3.428897 |
| 23            | 6             | 0.000000                | -3.472295 | -2.427950 |
| 24            | 6             | 0.000000                | 3.437959  | 2.458280  |
| 25            | 6             | 0.000000                | 2.447205  | 3.450118  |
| 26            | 6             | 0.000000                | 2.498611  | -3.428897 |
| 27            | 6             | 0.000000                | 3.472295  | -2.427950 |
| 28            | 1             | 0.000000                | -4.488305 | 2.726228  |
| 29            | 1             | 0.000000                | -2.715255 | 4.500363  |
| 30            | 1             | 0.000000                | -2.798229 | -4.472302 |
| 31            | 1             | 0.000000                | -4.527291 | -2.677023 |
| 32            | 1             | 0.000000                | 4.488305  | 2.726228  |
| 33            | 1             | 0.000000                | 2.715255  | 4.500363  |
| 34            | 1             | 0.000000                | 2.798229  | -4.472302 |
| 35            | 1             | 0.000000                | 4.527291  | -2.677023 |
| 36            | 7             | 0.000000                | 0.000000  | -3.871513 |
| 37            | 1             | 0.000000                | 0.000000  | -4.878113 |

**Table S19.** The optimized Cartesian coordinates for the anion of the compound **4** calculated at the B3LYP/6–31+G(d) level of theory

| Center Number | Atomic Number | Coordinates (Angstroms) |           |           |
|---------------|---------------|-------------------------|-----------|-----------|
|               |               | X                       | Y         | Z         |
| 1             | 6             | 0.000000                | 0.708535  | 1.707667  |
| 2             | 6             | 0.000000                | 1.113169  | 3.059693  |
| 3             | 6             | 0.000000                | -1.113169 | 3.059693  |
| 4             | 6             | 0.000000                | -0.708535 | 1.707667  |
| 5             | 6             | 0.000000                | -1.701788 | 0.709215  |
| 6             | 6             | 0.000000                | -1.704822 | -0.712190 |
| 7             | 6             | 0.000000                | -3.061709 | -1.101032 |
| 8             | 6             | 0.000000                | -3.051691 | 1.122211  |
| 9             | 6             | 0.000000                | -0.712165 | -1.719703 |
| 10            | 6             | 0.000000                | 1.701788  | 0.709215  |
| 11            | 6             | 0.000000                | 1.704822  | -0.712190 |
| 12            | 6             | 0.000000                | 0.712165  | -1.719703 |
| 13            | 8             | 0.000000                | -3.892675 | 0.016602  |
| 14            | 8             | 0.000000                | 0.000000  | 3.895757  |
| 15            | 6             | 0.000000                | 3.051691  | 1.122211  |
| 16            | 6             | 0.000000                | 3.061709  | -1.101032 |
| 17            | 8             | 0.000000                | 3.892675  | 0.016602  |
| 18            | 6             | 0.000000                | -1.145175 | -3.077852 |
| 19            | 6             | 0.000000                | 1.145175  | -3.077852 |
| 20            | 6             | 0.000000                | -3.448639 | 2.452950  |
| 21            | 6             | 0.000000                | -2.442096 | 3.460181  |

|    |   |          |           |           |
|----|---|----------|-----------|-----------|
| 22 | 6 | 0.000000 | -2.494017 | -3.440587 |
| 23 | 6 | 0.000000 | -3.482827 | -2.423357 |
| 24 | 6 | 0.000000 | 3.448639  | 2.452950  |
| 25 | 6 | 0.000000 | 2.442096  | 3.460181  |
| 26 | 6 | 0.000000 | 2.494017  | -3.440587 |
| 27 | 6 | 0.000000 | 3.482827  | -2.423357 |
| 28 | 1 | 0.000000 | -4.499897 | 2.720449  |
| 29 | 1 | 0.000000 | -2.709578 | 4.511409  |
| 30 | 1 | 0.000000 | -2.791508 | -4.485900 |
| 31 | 1 | 0.000000 | -4.538861 | -2.671969 |
| 32 | 1 | 0.000000 | 4.499897  | 2.720449  |
| 33 | 1 | 0.000000 | 2.709578  | 4.511409  |
| 34 | 1 | 0.000000 | 2.791508  | -4.485900 |
| 35 | 1 | 0.000000 | 4.538861  | -2.671969 |
| 36 | 7 | 0.000000 | 0.000000  | -3.877572 |
| 37 | 1 | 0.000000 | 0.000000  | -4.883015 |

**Table S20.** The optimized Cartesian coordinates for the dianion of the compound **4** calculated at the B3LYP/6–31+G(d) level of theory

| Center<br>Number | Atomic<br>Number | Coordinates (Angstroms) |           |           |
|------------------|------------------|-------------------------|-----------|-----------|
|                  |                  | X                       | Y         | Z         |
| 1                | 6                | 0.022030                | -1.712126 | 0.702318  |
| 2                | 6                | 0.011809                | -3.070901 | 1.120881  |
| 3                | 6                | 0.011809                | -3.070901 | -1.120881 |
| 4                | 6                | 0.022030                | -1.712126 | -0.702318 |
| 5                | 6                | 0.015111                | -0.703069 | -1.705684 |
| 6                | 6                | 0.016813                | 0.705743  | -1.708437 |
| 7                | 6                | -0.014615               | 1.109493  | -3.073134 |
| 8                | 6                | -0.008659               | -1.129696 | -3.061989 |
| 9                | 6                | 0.025993                | 1.724385  | -0.707189 |
| 10               | 6                | 0.015111                | -0.703069 | 1.705684  |
| 11               | 6                | 0.016813                | 0.705743  | 1.708437  |
| 12               | 6                | 0.025993                | 1.724385  | 0.707189  |
| 13               | 8                | -0.026486               | -0.016138 | -3.906277 |
| 14               | 8                | 0.011274                | -3.910284 | 0.000000  |
| 15               | 6                | -0.008659               | -1.129696 | 3.061989  |
| 16               | 6                | -0.014615               | 1.109493  | 3.073134  |
| 17               | 8                | -0.026486               | -0.016138 | 3.906277  |
| 18               | 6                | 0.020131                | 3.086987  | -1.152795 |
| 19               | 6                | 0.020131                | 3.086987  | 1.152795  |
| 20               | 6                | -0.016059               | -2.450637 | -3.462183 |
| 21               | 6                | -0.004064               | -3.474019 | -2.440037 |
| 22               | 6                | -0.013137               | 3.453943  | -2.488969 |
| 23               | 6                | -0.036287               | 2.421256  | -3.495670 |
| 24               | 6                | -0.016059               | -2.450637 | 3.462183  |
| 25               | 6                | -0.004064               | -3.474019 | 2.440037  |
| 26               | 6                | -0.013137               | 3.453943  | 2.488969  |
| 27               | 6                | -0.036287               | 2.421256  | 3.495670  |
| 28               | 1                | -0.034689               | -2.718693 | -4.515103 |
| 29               | 1                | -0.014096               | -4.526930 | -2.708528 |
| 30               | 1                | -0.010541               | 4.502038  | -2.785282 |
| 31               | 1                | -0.066129               | 2.671998  | -4.552791 |
| 32               | 1                | -0.034689               | -2.718693 | 4.515103  |
| 33               | 1                | -0.014096               | -4.526930 | 2.708528  |
| 34               | 1                | -0.010541               | 4.502038  | 2.785282  |
| 35               | 1                | -0.066129               | 2.671998  | 4.552791  |
| 36               | 7                | 0.095168                | 3.902936  | 0.000000  |
| 37               | 1                | -0.310457               | 4.826792  | 0.000000  |

**Table S21.** The optimized Cartesian coordinates for the cation of the compound **4** calculated at the B3LYP/6–31+G(d) level of theory

| Center Number | Atomic Number | Coordinates (Angstroms) |           |           |
|---------------|---------------|-------------------------|-----------|-----------|
|               |               | X                       | Y         | Z         |
| 1             | 6             | 0.000000                | 0.713411  | 1.703521  |
| 2             | 6             | 0.000000                | 1.102444  | 3.044997  |
| 3             | 6             | 0.000000                | -1.102444 | 3.044997  |
| 4             | 6             | 0.000000                | -0.713411 | 1.703521  |
| 5             | 6             | 0.000000                | -1.700519 | 0.716573  |
| 6             | 6             | 0.000000                | -1.696293 | -0.709453 |
| 7             | 6             | 0.000000                | -3.065164 | -1.096337 |
| 8             | 6             | 0.000000                | -3.042087 | 1.112333  |
| 9             | 6             | 0.000000                | -0.720065 | -1.697568 |
| 10            | 6             | 0.000000                | 1.700519  | 0.716573  |
| 11            | 6             | 0.000000                | 1.696293  | -0.709453 |
| 12            | 6             | 0.000000                | 0.720065  | -1.697568 |
| 13            | 8             | 0.000000                | -3.880491 | -0.002784 |
| 14            | 8             | 0.000000                | 0.000000  | 3.873871  |
| 15            | 6             | 0.000000                | 3.042087  | 1.112333  |
| 16            | 6             | 0.000000                | 3.065164  | -1.096337 |
| 17            | 8             | 0.000000                | 3.880491  | -0.002784 |
| 18            | 6             | 0.000000                | -1.137255 | -3.051312 |
| 19            | 6             | 0.000000                | 1.137255  | -3.051312 |
| 20            | 6             | 0.000000                | -3.444815 | 2.452445  |
| 21            | 6             | 0.000000                | -2.451762 | 3.441315  |
| 22            | 6             | 0.000000                | -2.503471 | -3.427176 |
| 23            | 6             | 0.000000                | -3.482803 | -2.433695 |
| 24            | 6             | 0.000000                | 3.444815  | 2.452445  |
| 25            | 6             | 0.000000                | 2.451762  | 3.441315  |
| 26            | 6             | 0.000000                | 2.503471  | -3.427176 |
| 27            | 6             | 0.000000                | 3.482803  | -2.433695 |
| 28            | 1             | 0.000000                | -4.494239 | 2.721462  |
| 29            | 1             | 0.000000                | -2.721150 | 4.491244  |
| 30            | 1             | 0.000000                | -2.793697 | -4.472555 |
| 31            | 1             | 0.000000                | -4.536120 | -2.686778 |
| 32            | 1             | 0.000000                | 4.494239  | 2.721462  |
| 33            | 1             | 0.000000                | 2.721150  | 4.491244  |
| 34            | 1             | 0.000000                | 2.793697  | -4.472555 |
| 35            | 1             | 0.000000                | 4.536120  | -2.686778 |
| 36            | 7             | 0.000000                | 0.000000  | -3.838559 |
| 37            | 1             | 0.000000                | 0.000000  | -4.850988 |

**Table S22.** The optimized Cartesian coordinates for the dication of the compound **4** calculated at the B3LYP/6–31+G(d) level of theory

| Center Number | Atomic Number | Coordinates (Angstroms) |           |           |
|---------------|---------------|-------------------------|-----------|-----------|
|               |               | X                       | Y         | Z         |
| 1             | 6             | 0.000000                | 1.707166  | -0.693690 |
| 2             | 6             | 0.000000                | 3.069702  | -1.083332 |
| 3             | 6             | 0.000000                | 0.692389  | -1.725177 |
| 4             | 6             | 0.000000                | -1.707166 | -0.693690 |
| 5             | 6             | 0.000000                | -0.692389 | -1.725177 |
| 6             | 6             | 0.000000                | -3.069702 | -1.083332 |
| 7             | 6             | 0.000000                | 1.127823  | -3.095839 |
| 8             | 6             | 0.000000                | -1.127823 | -3.095839 |
| 9             | 6             | 0.000000                | 2.481288  | -3.430019 |
| 10            | 6             | 0.000000                | 3.469499  | -2.411714 |
| 11            | 6             | 0.000000                | -2.481288 | -3.430019 |
| 12            | 6             | 0.000000                | -3.469499 | -2.411714 |
| 13            | 1             | 0.000000                | 2.800861  | -4.467107 |
| 14            | 1             | 0.000000                | 4.521553  | -2.676122 |
| 15            | 1             | 0.000000                | -2.800861 | -4.467107 |
| 16            | 1             | 0.000000                | -4.521553 | -2.676122 |
| 17            | 6             | 0.000000                | -0.692827 | 1.713863  |
| 18            | 6             | 0.000000                | -1.098640 | 3.072626  |
| 19            | 6             | 0.000000                | 1.098640  | 3.072626  |
| 20            | 6             | 0.000000                | 0.692827  | 1.713863  |
| 21            | 6             | 0.000000                | 1.704495  | 0.694897  |

|    |   |          |           |           |
|----|---|----------|-----------|-----------|
| 22 | 6 | 0.000000 | 3.062651  | 1.109765  |
| 23 | 6 | 0.000000 | -1.704495 | 0.694897  |
| 24 | 8 | 0.000000 | 0.000000  | 3.891982  |
| 25 | 6 | 0.000000 | -3.062651 | 1.109765  |
| 26 | 6 | 0.000000 | 3.439504  | 2.444013  |
| 27 | 6 | 0.000000 | 2.432557  | 3.452142  |
| 28 | 6 | 0.000000 | -3.439504 | 2.444013  |
| 29 | 6 | 0.000000 | -2.432557 | 3.452142  |
| 30 | 1 | 0.000000 | 4.486708  | 2.726809  |
| 31 | 1 | 0.000000 | 2.715827  | 4.499205  |
| 32 | 1 | 0.000000 | -4.486708 | 2.726809  |
| 33 | 1 | 0.000000 | -2.715827 | 4.499205  |
| 34 | 8 | 0.000000 | 3.885260  | 0.016523  |
| 35 | 8 | 0.000000 | -3.885260 | 0.016523  |
| 36 | 7 | 0.000000 | 0.000000  | -3.890579 |
| 37 | 1 | 0.000000 | 0.000000  | -4.902188 |

**Table S23.** The optimized Cartesian coordinates of the compound **5** calculated at the B3LYP/6-31+G(d) level of theory

| Center Number | Atomic Number | Coordinates (Angstroms) |           |           |
|---------------|---------------|-------------------------|-----------|-----------|
|               |               | X                       | Y         | Z         |
| 1             | 6             | 0.000000                | 0.716606  | 1.721241  |
| 2             | 6             | 0.000000                | 1.136238  | 3.074292  |
| 3             | 6             | 0.000000                | -1.136238 | 3.074292  |
| 4             | 6             | 0.000000                | -0.716606 | 1.721241  |
| 5             | 6             | 0.000000                | -1.699123 | 0.718780  |
| 6             | 6             | 0.000000                | -1.699123 | -0.718780 |
| 7             | 6             | 0.000000                | -3.047009 | -1.101869 |
| 8             | 6             | 0.000000                | -3.047009 | 1.101869  |
| 9             | 6             | 0.000000                | -0.716606 | -1.721241 |
| 10            | 6             | 0.000000                | 1.699123  | 0.718780  |
| 11            | 6             | 0.000000                | 1.699123  | -0.718780 |
| 12            | 6             | 0.000000                | 0.716606  | -1.721241 |
| 13            | 8             | 0.000000                | -3.880265 | 0.000000  |
| 14            | 7             | 0.000000                | 0.000000  | 3.875463  |
| 15            | 6             | 0.000000                | 3.047009  | 1.101869  |
| 16            | 6             | 0.000000                | 3.047009  | -1.101869 |
| 17            | 8             | 0.000000                | 3.880265  | 0.000000  |
| 18            | 6             | 0.000000                | -1.136238 | -3.074292 |
| 19            | 7             | 0.000000                | 0.000000  | -3.875463 |
| 20            | 6             | 0.000000                | 1.136238  | -3.074292 |
| 21            | 6             | 0.000000                | -3.468302 | 2.436140  |
| 22            | 6             | 0.000000                | -2.495760 | 3.437175  |
| 23            | 6             | 0.000000                | -2.495760 | -3.437175 |
| 24            | 6             | 0.000000                | -3.468302 | -2.436140 |
| 25            | 6             | 0.000000                | 3.468302  | 2.436140  |
| 26            | 6             | 0.000000                | 2.495760  | 3.437175  |
| 27            | 6             | 0.000000                | 2.495760  | -3.437175 |
| 28            | 6             | 0.000000                | 3.468302  | -2.436140 |
| 29            | 1             | 0.000000                | -4.523989 | 2.682642  |
| 30            | 1             | 0.000000                | -2.793089 | 4.481287  |
| 31            | 1             | 0.000000                | -2.793089 | -4.481287 |
| 32            | 1             | 0.000000                | -4.523989 | -2.682642 |
| 33            | 1             | 0.000000                | 4.523989  | 2.682642  |
| 34            | 1             | 0.000000                | 2.793089  | 4.481287  |
| 35            | 1             | 0.000000                | 2.793089  | -4.481287 |
| 36            | 1             | 0.000000                | 4.523989  | -2.682642 |
| 37            | 1             | 0.000000                | 0.000000  | -4.881893 |
| 38            | 1             | 0.000000                | 0.000000  | 4.881893  |

**Table S24.** The optimized Cartesian coordinates for the anion of the compound **5** calculated at the B3LYP/6–31+G(d) level of theory

| Center Number | Atomic Number | Coordinates (Angstroms) |           |           |
|---------------|---------------|-------------------------|-----------|-----------|
|               |               | X                       | Y         | Z         |
| 1             | 6             | 0.000000                | 0.711500  | 1.722601  |
| 2             | 6             | 0.000000                | 1.144767  | 3.081728  |
| 3             | 6             | 0.000000                | -1.144767 | 3.081728  |
| 4             | 6             | 0.000000                | -0.711500 | 1.722601  |
| 5             | 6             | 0.000000                | -1.701901 | 0.712307  |
| 6             | 6             | 0.000000                | -1.701901 | -0.712307 |
| 7             | 6             | 0.000000                | -3.057789 | -1.109573 |
| 8             | 6             | 0.000000                | -3.057789 | 1.109573  |
| 9             | 6             | 0.000000                | -0.711500 | -1.722601 |
| 10            | 6             | 0.000000                | 1.701901  | 0.712307  |
| 11            | 6             | 0.000000                | 1.701901  | -0.712307 |
| 12            | 6             | 0.000000                | 0.711500  | -1.722601 |
| 13            | 8             | 0.000000                | -3.893594 | 0.000000  |
| 14            | 7             | 0.000000                | 0.000000  | 3.881286  |
| 15            | 6             | 0.000000                | 3.057789  | 1.109573  |
| 16            | 6             | 0.000000                | 3.057789  | -1.109573 |
| 17            | 8             | 0.000000                | 3.893594  | 0.000000  |
| 18            | 6             | 0.000000                | -1.144767 | -3.081728 |
| 19            | 7             | 0.000000                | 0.000000  | -3.881286 |
| 20            | 6             | 0.000000                | 1.144767  | -3.081728 |
| 21            | 6             | 0.000000                | -3.479325 | 2.431388  |
| 22            | 6             | 0.000000                | -2.491257 | 3.448572  |
| 23            | 6             | 0.000000                | -2.491257 | -3.448572 |
| 24            | 6             | 0.000000                | -3.479325 | -2.431388 |
| 25            | 6             | 0.000000                | 3.479325  | 2.431388  |
| 26            | 6             | 0.000000                | 2.491257  | 3.448572  |
| 27            | 6             | 0.000000                | 2.491257  | -3.448572 |
| 28            | 6             | 0.000000                | 3.479325  | -2.431388 |
| 29            | 1             | 0.000000                | -4.536000 | 2.677844  |
| 30            | 1             | 0.000000                | -2.786551 | 4.494654  |
| 31            | 1             | 0.000000                | -2.786551 | -4.494654 |
| 32            | 1             | 0.000000                | -4.536000 | -2.677844 |
| 33            | 1             | 0.000000                | 4.536000  | 2.677844  |
| 34            | 1             | 0.000000                | 2.786551  | 4.494654  |
| 35            | 1             | 0.000000                | 2.786551  | -4.494654 |
| 36            | 1             | 0.000000                | 4.536000  | -2.677844 |
| 37            | 1             | 0.000000                | 0.000000  | -4.886558 |
| 38            | 1             | 0.000000                | 0.000000  | 4.886558  |

**Table S25.** The optimized Cartesian coordinates for the dianion of the compound **5** calculated at the B3LYP/6–31+G(d) level of theory

| Center Number | Atomic Number | Coordinates (Angstroms) |           |           |
|---------------|---------------|-------------------------|-----------|-----------|
|               |               | X                       | Y         | Z         |
| 1             | 6             | -0.005804               | 1.727816  | 0.706718  |
| 2             | 6             | -0.009184               | 3.091229  | 1.152226  |
| 3             | 6             | -0.009184               | 3.091229  | -1.152226 |
| 4             | 6             | -0.005804               | 1.727816  | -0.706718 |
| 5             | 6             | -0.002433               | 0.706065  | -1.705302 |
| 6             | 6             | 0.002433                | -0.706065 | -1.705302 |
| 7             | 6             | -0.005899               | -1.117650 | -3.068927 |
| 8             | 6             | 0.005899                | 1.117650  | -3.068927 |
| 9             | 6             | 0.005804                | -1.727816 | -0.706718 |
| 10            | 6             | -0.002433               | 0.706065  | 1.705302  |
| 11            | 6             | 0.002433                | -0.706065 | 1.705302  |
| 12            | 6             | 0.005804                | -1.727816 | 0.706718  |
| 13            | 8             | 0.000000                | 0.000000  | -3.907111 |
| 14            | 7             | -0.085773               | 3.907001  | 0.000000  |
| 15            | 6             | 0.005899                | 1.117650  | 3.068927  |
| 16            | 6             | -0.005899               | -1.117650 | 3.068927  |
| 17            | 8             | 0.000000                | 0.000000  | 3.907111  |
| 18            | 6             | 0.009184                | -3.091229 | -1.152226 |
| 19            | 7             | 0.085773                | -3.907001 | 0.000000  |

|    |   |           |           |           |
|----|---|-----------|-----------|-----------|
| 20 | 6 | 0.009184  | -3.091229 | 1.152226  |
| 21 | 6 | 0.021197  | 2.429239  | -3.492502 |
| 22 | 6 | 0.010183  | 3.461853  | -2.486884 |
| 23 | 6 | -0.010183 | -3.461853 | -2.486884 |
| 24 | 6 | -0.021197 | -2.429239 | -3.492502 |
| 25 | 6 | 0.021197  | 2.429239  | 3.492502  |
| 26 | 6 | 0.010183  | 3.461853  | 2.486884  |
| 27 | 6 | -0.010183 | -3.461853 | 2.486884  |
| 28 | 6 | -0.021197 | -2.429239 | 3.492502  |
| 29 | 1 | 0.033540  | 2.677061  | -4.550759 |
| 30 | 1 | -0.001818 | 4.510617  | -2.780960 |
| 31 | 1 | 0.001818  | -4.510617 | -2.780960 |
| 32 | 1 | -0.033540 | -2.677061 | -4.550759 |
| 33 | 1 | 0.033540  | 2.677061  | 4.550759  |
| 34 | 1 | -0.001818 | 4.510617  | 2.780960  |
| 35 | 1 | 0.001818  | -4.510617 | 2.780960  |
| 36 | 1 | -0.033540 | -2.677061 | 4.550759  |
| 37 | 1 | -0.319650 | -4.831016 | 0.000000  |
| 38 | 1 | 0.319650  | 4.831016  | 0.000000  |

**Table S26.** The optimized Cartesian coordinates for the cation of the compound **5** calculated at the B3LYP/6-31+G(d) level of theory

| Center<br>Number | Atomic<br>Number | Coordinates (Angstroms) |           |           |
|------------------|------------------|-------------------------|-----------|-----------|
|                  |                  | X                       | Y         | Z         |
| 1                | 6                | 0.000000                | 0.714981  | 1.708812  |
| 2                | 6                | 0.000000                | 1.132609  | 3.059875  |
| 3                | 6                | 0.000000                | -1.132609 | 3.059875  |
| 4                | 6                | 0.000000                | -0.714981 | 1.708812  |
| 5                | 6                | 0.000000                | -1.696253 | 0.712964  |
| 6                | 6                | 0.000000                | -1.696253 | -0.712964 |
| 7                | 6                | 0.000000                | -3.052581 | -1.100608 |
| 8                | 6                | 0.000000                | -3.052581 | 1.100608  |
| 9                | 6                | 0.000000                | -0.714981 | -1.708812 |
| 10               | 6                | 0.000000                | 1.696253  | 0.712964  |
| 11               | 6                | 0.000000                | 1.696253  | -0.712964 |
| 12               | 6                | 0.000000                | 0.714981  | -1.708812 |
| 13               | 8                | 0.000000                | -3.883808 | 0.000000  |
| 14               | 7                | 0.000000                | 0.000000  | 3.856377  |
| 15               | 6                | 0.000000                | 3.052581  | 1.100608  |
| 16               | 6                | 0.000000                | 3.052581  | -1.100608 |
| 17               | 8                | 0.000000                | 3.883808  | 0.000000  |
| 18               | 6                | 0.000000                | -1.132609 | -3.059875 |
| 19               | 7                | 0.000000                | 0.000000  | -3.856377 |
| 20               | 6                | 0.000000                | 1.132609  | -3.059875 |
| 21               | 6                | 0.000000                | -3.476590 | 2.434344  |
| 22               | 6                | 0.000000                | -2.499090 | 3.429803  |
| 23               | 6                | 0.000000                | -2.499090 | -3.429803 |
| 24               | 6                | 0.000000                | -3.476590 | -2.434344 |
| 25               | 6                | 0.000000                | 3.476590  | 2.434344  |
| 26               | 6                | 0.000000                | 2.499090  | 3.429803  |
| 27               | 6                | 0.000000                | 2.499090  | -3.429803 |
| 28               | 6                | 0.000000                | 3.476590  | -2.434344 |
| 29               | 1                | 0.000000                | -4.530740 | 2.683530  |
| 30               | 1                | 0.000000                | -2.793321 | 4.474197  |
| 31               | 1                | 0.000000                | -2.793321 | -4.474197 |
| 32               | 1                | 0.000000                | -4.530740 | -2.683530 |
| 33               | 1                | 0.000000                | 4.530740  | 2.683530  |
| 34               | 1                | 0.000000                | 2.793321  | 4.474197  |
| 35               | 1                | 0.000000                | 2.793321  | -4.474197 |
| 36               | 1                | 0.000000                | 4.530740  | -2.683530 |
| 37               | 1                | 0.000000                | 0.000000  | -4.866676 |
| 38               | 1                | 0.000000                | 0.000000  | 4.866676  |



**Table S27.** The optimized Cartesian coordinates for the dication of the compound **5** calculated at the B3LYP/6–31+G(d) level of theory

| Center Number | Atomic Number | Coordinates (Angstroms) |           |           |
|---------------|---------------|-------------------------|-----------|-----------|
|               |               | X                       | Y         | Z         |
| 1             | 6             | 0.000000                | 0.692050  | 1.729955  |
| 2             | 6             | 0.000000                | 1.127381  | 3.100209  |
| 3             | 6             | 0.000000                | -1.127381 | 3.100209  |
| 4             | 6             | 0.000000                | -0.692050 | 1.729955  |
| 5             | 6             | 0.000000                | -1.702653 | 0.695354  |
| 6             | 6             | 0.000000                | -1.702653 | -0.695354 |
| 7             | 6             | 0.000000                | -3.064303 | -1.093936 |
| 8             | 6             | 0.000000                | -3.064303 | 1.093936  |
| 9             | 6             | 0.000000                | -0.692050 | -1.729955 |
| 10            | 6             | 0.000000                | 1.702653  | 0.695354  |
| 11            | 6             | 0.000000                | 1.702653  | -0.695354 |
| 12            | 6             | 0.000000                | 0.692050  | -1.729955 |
| 13            | 8             | 0.000000                | -3.883396 | 0.000000  |
| 14            | 7             | 0.000000                | 0.000000  | 3.894821  |
| 15            | 6             | 0.000000                | 3.064303  | 1.093936  |
| 16            | 6             | 0.000000                | 3.064303  | -1.093936 |
| 17            | 8             | 0.000000                | 3.883396  | 0.000000  |
| 18            | 6             | 0.000000                | -1.127381 | -3.100209 |
| 19            | 7             | 0.000000                | 0.000000  | -3.894821 |
| 20            | 6             | 0.000000                | 1.127381  | -3.100209 |
| 21            | 6             | 0.000000                | -3.465655 | 2.420953  |
| 22            | 6             | 0.000000                | -2.479326 | 3.438670  |
| 23            | 6             | 0.000000                | -2.479326 | -3.438670 |
| 24            | 6             | 0.000000                | -3.465655 | -2.420953 |
| 25            | 6             | 0.000000                | 3.465655  | 2.420953  |
| 26            | 6             | 0.000000                | 2.479326  | 3.438670  |
| 27            | 6             | 0.000000                | 2.479326  | -3.438670 |
| 28            | 6             | 0.000000                | 3.465655  | -2.420953 |
| 29            | 1             | 0.000000                | -4.518353 | 2.681946  |
| 30            | 1             | 0.000000                | -2.796251 | 4.476411  |
| 31            | 1             | 0.000000                | -2.796251 | -4.476411 |
| 32            | 1             | 0.000000                | -4.518353 | -2.681946 |
| 33            | 1             | 0.000000                | 4.518353  | 2.681946  |
| 34            | 1             | 0.000000                | 2.796251  | 4.476411  |
| 35            | 1             | 0.000000                | 2.796251  | -4.476411 |
| 36            | 1             | 0.000000                | 4.518353  | -2.681946 |
| 37            | 1             | 0.000000                | 0.000000  | -4.906245 |
| 38            | 1             | 0.000000                | 0.000000  | 4.906245  |

**Table S28.** The optimized Cartesian coordinates of the compound **6** calculated at the B3LYP/6–31+G(d) level of theory

| Center Number | Atomic Number | Coordinates (Angstroms) |           |           |
|---------------|---------------|-------------------------|-----------|-----------|
|               |               | X                       | Y         | Z         |
| 1             | 6             | 0.000000                | 1.720932  | -0.719199 |
| 2             | 6             | 0.000000                | 3.078920  | -1.122154 |
| 3             | 6             | 0.000000                | 3.070096  | 1.145616  |
| 4             | 6             | 0.000000                | 1.718107  | 0.716777  |
| 5             | 6             | 0.000000                | 0.718104  | 1.702439  |
| 6             | 6             | 0.000000                | -0.718104 | 1.702439  |
| 7             | 6             | 0.000000                | -1.101155 | 3.050971  |
| 8             | 6             | 0.000000                | 1.101155  | 3.050971  |
| 9             | 6             | 0.000000                | -1.718107 | 0.716777  |
| 10            | 6             | 0.000000                | 0.720099  | -1.714492 |
| 11            | 6             | 0.000000                | -0.720099 | -1.714492 |
| 12            | 6             | 0.000000                | -1.720932 | -0.719199 |
| 13            | 8             | 0.000000                | 0.000000  | 3.884359  |
| 14            | 7             | 0.000000                | 3.875613  | 0.016609  |
| 15            | 6             | 0.000000                | 1.132250  | -3.070764 |
| 16            | 6             | 0.000000                | -1.132250 | -3.070764 |
| 17            | 6             | 0.000000                | -3.070096 | 1.145616  |
| 18            | 7             | 0.000000                | -3.875613 | 0.016609  |
| 19            | 6             | 0.000000                | -3.078920 | -1.122154 |

|    |   |          |           |           |
|----|---|----------|-----------|-----------|
| 20 | 6 | 0.000000 | 2.433213  | 3.476594  |
| 21 | 6 | 0.000000 | 3.433453  | 2.504347  |
| 22 | 6 | 0.000000 | -3.433453 | 2.504347  |
| 23 | 6 | 0.000000 | -2.433213 | 3.476594  |
| 24 | 6 | 0.000000 | 2.485229  | -3.456227 |
| 25 | 6 | 0.000000 | 3.468337  | -2.473768 |
| 26 | 6 | 0.000000 | -3.468337 | -2.473768 |
| 27 | 6 | 0.000000 | -2.485229 | -3.456227 |
| 28 | 1 | 0.000000 | 2.677095  | 4.532891  |
| 29 | 1 | 0.000000 | 4.478281  | 2.799619  |
| 30 | 1 | 0.000000 | -4.478281 | 2.799619  |
| 31 | 1 | 0.000000 | -2.677095 | 4.532891  |
| 32 | 1 | 0.000000 | 2.762154  | -4.506228 |
| 33 | 1 | 0.000000 | 4.518341  | -2.750334 |
| 34 | 1 | 0.000000 | -4.518341 | -2.750334 |
| 35 | 1 | 0.000000 | -2.762154 | -4.506228 |
| 36 | 1 | 0.000000 | -4.881845 | 0.020128  |
| 37 | 1 | 0.000000 | 4.881845  | 0.020128  |
| 38 | 7 | 0.000000 | 0.000000  | -3.871880 |
| 39 | 1 | 0.000000 | 0.000000  | -4.878056 |

**Table S29.** The optimized Cartesian coordinates for the anion of the compound **6** calculated at the B3LYP/6-31+G(d) level of theory

| Center<br>Number | Atomic<br>Number | Coordinates (Angstroms) |           |           |
|------------------|------------------|-------------------------|-----------|-----------|
|                  |                  | X                       | Y         | Z         |
| 1                | 6                | -0.008028               | 0.714631  | 1.722844  |
| 2                | 6                | -0.018885               | 1.131576  | 3.087754  |
| 3                | 6                | -0.024340               | -1.153163 | 3.077463  |
| 4                | 6                | -0.013886               | -0.711938 | 1.719941  |
| 5                | 6                | -0.006306               | -1.704712 | 0.711817  |
| 6                | 6                | -0.006306               | -1.704712 | -0.711817 |
| 7                | 6                | 0.005572                | -3.061487 | -1.108975 |
| 8                | 6                | 0.005572                | -3.061487 | 1.108975  |
| 9                | 6                | -0.013886               | -0.711938 | -1.719941 |
| 10               | 6                | 0.008381                | 1.716964  | 0.715541  |
| 11               | 6                | 0.008381                | 1.716964  | -0.715541 |
| 12               | 6                | -0.008028               | 0.714631  | -1.722844 |
| 13               | 8                | 0.014545                | -3.897174 | 0.000000  |
| 14               | 7                | -0.065062               | -0.016104 | 3.884457  |
| 15               | 6                | 0.035312                | 3.079419  | 1.140939  |
| 16               | 6                | 0.035312                | 3.079419  | -1.140939 |
| 17               | 6                | -0.024340               | -1.153163 | -3.077463 |
| 18               | 7                | -0.065062               | -0.016104 | -3.884457 |
| 19               | 6                | -0.018885               | 1.131576  | -3.087754 |
| 20               | 6                | 0.006324                | -3.486919 | 2.428510  |
| 21               | 6                | -0.012738               | -2.498910 | 3.444846  |
| 22               | 6                | -0.012738               | -2.498910 | -3.444846 |
| 23               | 6                | 0.006324                | -3.486919 | -2.428510 |
| 24               | 6                | 0.030287                | 3.467671  | 2.480291  |
| 25               | 6                | -0.003927               | 2.469174  | 3.479497  |
| 26               | 6                | -0.003927               | 2.469174  | -3.479497 |
| 27               | 6                | 0.030287                | 3.467671  | -2.480291 |
| 28               | 1                | 0.016901                | -4.543998 | 2.673127  |
| 29               | 1                | -0.020244               | -2.792488 | 4.491502  |
| 30               | 1                | -0.020244               | -2.792488 | -4.491502 |
| 31               | 1                | 0.016901                | -4.543998 | -2.673127 |
| 32               | 1                | 0.053608                | 4.519135  | 2.756182  |
| 33               | 1                | -0.015921               | 2.744890  | 4.531157  |
| 34               | 1                | -0.015921               | 2.744890  | -4.531157 |
| 35               | 1                | 0.053608                | 4.519135  | -2.756182 |
| 36               | 1                | 0.101460                | -0.020570 | -4.876499 |
| 37               | 1                | 0.101460                | -0.020570 | 4.876499  |
| 38               | 7                | 0.091149                | 3.881408  | 0.000000  |
| 39               | 1                | -0.088330               | 4.871390  | 0.000000  |

**Table S30.** The optimized Cartesian coordinates for the dianion of the compound **6** calculated at the B3LYP/6–31+G(d) level of theory

| Center Number | Atomic Number | Coordinates (Angstroms) |           |           |
|---------------|---------------|-------------------------|-----------|-----------|
|               |               | X                       | Y         | Z         |
| 1             | 6             | -0.026665               | 0.709695  | 1.727156  |
| 2             | 6             | -0.050464               | 1.140082  | 3.097108  |
| 3             | 6             | -0.061569               | -1.159720 | 3.085998  |
| 4             | 6             | -0.040215               | -0.707044 | 1.724538  |
| 5             | 6             | -0.017857               | -1.708164 | 0.705514  |
| 6             | 6             | -0.017857               | -1.708164 | -0.705514 |
| 7             | 6             | 0.020101                | -3.072063 | -1.117118 |
| 8             | 6             | 0.020101                | -3.072063 | 1.117118  |
| 9             | 6             | -0.040215               | -0.707044 | -1.724538 |
| 10            | 6             | 0.017609                | 1.720438  | 0.710625  |
| 11            | 6             | 0.017609                | 1.720438  | -0.710625 |
| 12            | 6             | -0.026665               | 0.709695  | -1.727156 |
| 13            | 8             | 0.047680                | -3.909634 | 0.000000  |
| 14            | 7             | -0.157970               | -0.014711 | 3.908215  |
| 15            | 6             | 0.083724                | 3.086733  | 1.148882  |
| 16            | 6             | 0.083724                | 3.086733  | -1.148882 |
| 17            | 6             | -0.061569               | -1.159720 | -3.085998 |
| 18            | 7             | -0.157970               | -0.014711 | -3.908215 |
| 19            | 6             | -0.050464               | 1.140082  | -3.097108 |
| 20            | 6             | 0.025515                | -3.498683 | 2.427009  |
| 21            | 6             | -0.026571               | -2.493461 | 3.457891  |
| 22            | 6             | -0.026571               | -2.493461 | -3.457891 |
| 23            | 6             | 0.025515                | -3.498683 | -2.427009 |
| 24            | 6             | 0.073214                | 3.478489  | 2.476231  |
| 25            | 6             | -0.010734               | 2.465268  | 3.491514  |
| 26            | 6             | -0.010734               | 2.465268  | -3.491514 |
| 27            | 6             | 0.073214                | 3.478489  | -2.476231 |
| 28            | 1             | 0.057033                | -4.556970 | 2.673248  |
| 29            | 1             | -0.047039               | -2.785281 | 4.507263  |
| 30            | 1             | -0.047039               | -2.785281 | -4.507263 |
| 31            | 1             | 0.057033                | -4.556970 | -2.673248 |
| 32            | 1             | 0.135847                | 4.531055  | 2.751036  |
| 33            | 1             | -0.040033               | 2.740536  | 4.545408  |
| 34            | 1             | -0.040033               | 2.740536  | -4.545408 |
| 35            | 1             | 0.135847                | 4.531055  | -2.751036 |
| 36            | 1             | 0.268146                | -0.020357 | -4.823665 |
| 37            | 1             | 0.268146                | -0.020357 | 4.823665  |
| 38            | 7             | 0.206454                | 3.900003  | 0.000000  |
| 39            | 1             | -0.195968               | 4.826200  | 0.000000  |

**Table S31.** The optimized Cartesian coordinates for the cation of the compound **6** calculated at the B3LYP/6–31+G(d) level of theory

| Center Number | Atomic Number | Coordinates (Angstroms) |           |           |
|---------------|---------------|-------------------------|-----------|-----------|
|               |               | X                       | Y         | Z         |
| 1             | 6             | 0.000000                | 1.712294  | -0.715701 |
| 2             | 6             | 0.000000                | 3.090079  | -1.130252 |
| 3             | 6             | 0.000000                | 3.062383  | 1.144129  |
| 4             | 6             | 0.000000                | 1.716290  | 0.726228  |
| 5             | 6             | 0.000000                | 0.719260  | 1.704553  |
| 6             | 6             | 0.000000                | -0.719260 | 1.704553  |
| 7             | 6             | 0.000000                | -1.101422 | 3.053934  |
| 8             | 6             | 0.000000                | 1.101422  | 3.053934  |
| 9             | 6             | 0.000000                | -1.716290 | 0.726228  |
| 10            | 6             | 0.000000                | 0.728359  | -1.694436 |
| 11            | 6             | 0.000000                | -0.728359 | -1.694436 |
| 12            | 6             | 0.000000                | -1.712294 | -0.715701 |
| 13            | 8             | 0.000000                | 0.000000  | 3.879116  |
| 14            | 7             | 0.000000                | 3.866082  | -0.004811 |
| 15            | 6             | 0.000000                | 1.137203  | -3.057334 |

|    |   |          |           |           |
|----|---|----------|-----------|-----------|
| 16 | 6 | 0.000000 | -1.137203 | -3.057334 |
| 17 | 6 | 0.000000 | -3.062383 | 1.144129  |
| 18 | 7 | 0.000000 | -3.866082 | -0.004811 |
| 19 | 6 | 0.000000 | -3.090079 | -1.130252 |
| 20 | 6 | 0.000000 | 2.436408  | 3.472886  |
| 21 | 6 | 0.000000 | 3.435737  | 2.498288  |
| 22 | 6 | 0.000000 | -3.435737 | 2.498288  |
| 23 | 6 | 0.000000 | -2.436408 | 3.472886  |
| 24 | 6 | 0.000000 | 2.489921  | -3.460906 |
| 25 | 6 | 0.000000 | 3.475861  | -2.486895 |
| 26 | 6 | 0.000000 | -3.475861 | -2.486895 |
| 27 | 6 | 0.000000 | -2.489921 | -3.460906 |
| 28 | 1 | 0.000000 | 2.686138  | 4.527428  |
| 29 | 1 | 0.000000 | 4.479882  | 2.791868  |
| 30 | 1 | 0.000000 | -4.479882 | 2.791868  |
| 31 | 1 | 0.000000 | -2.686138 | 4.527428  |
| 32 | 1 | 0.000000 | 2.756611  | -4.512345 |
| 33 | 1 | 0.000000 | 4.523560  | -2.766743 |
| 34 | 1 | 0.000000 | -4.523560 | -2.766743 |
| 35 | 1 | 0.000000 | -2.756611 | -4.512345 |
| 36 | 1 | 0.000000 | -4.875738 | -0.001131 |
| 37 | 1 | 0.000000 | 4.875738  | -0.001131 |
| 38 | 7 | 0.000000 | 0.000000  | -3.835690 |
| 39 | 1 | 0.000000 | 0.000000  | -4.847819 |

**Table S32.** The optimized Cartesian coordinates for the dication of the compound **6** calculated at the B3LYP/6–31+G(d) level of theory

| Center<br>Number | Atomic<br>Number | Coordinates (Angstroms) |           |           |
|------------------|------------------|-------------------------|-----------|-----------|
|                  |                  | X                       | Y         | Z         |
| 1                | 6                | 0.000000                | 1.727621  | -0.691123 |
| 2                | 6                | 0.000000                | 3.100322  | -1.110765 |
| 3                | 6                | 0.000000                | 3.096956  | 1.139540  |
| 4                | 6                | 0.000000                | 1.725572  | 0.695261  |
| 5                | 6                | 0.000000                | 0.696687  | 1.708439  |
| 6                | 6                | 0.000000                | -0.696687 | 1.708439  |
| 7                | 6                | 0.000000                | -1.093750 | 3.065291  |
| 8                | 6                | 0.000000                | 1.093750  | 3.065291  |
| 9                | 6                | 0.000000                | -1.725572 | 0.695261  |
| 10               | 6                | 0.000000                | 0.693108  | -1.716908 |
| 11               | 6                | 0.000000                | -0.693108 | -1.716908 |
| 12               | 6                | 0.000000                | -1.727621 | -0.691123 |
| 13               | 8                | 0.000000                | 0.000000  | 3.884870  |
| 14               | 7                | 0.000000                | 3.892850  | 0.018339  |
| 15               | 6                | 0.000000                | 1.123258  | -3.095791 |
| 16               | 6                | 0.000000                | -1.123258 | -3.095791 |
| 17               | 6                | 0.000000                | -3.096956 | 1.139540  |
| 18               | 7                | 0.000000                | -3.892850 | 0.018339  |
| 19               | 6                | 0.000000                | -3.100322 | -1.110765 |
| 20               | 6                | 0.000000                | 2.422431  | 3.472386  |
| 21               | 6                | 0.000000                | 3.437928  | 2.491433  |
| 22               | 6                | 0.000000                | -3.437928 | 2.491433  |
| 23               | 6                | 0.000000                | -2.422431 | 3.472386  |
| 24               | 6                | 0.000000                | 2.465264  | -3.455107 |
| 25               | 6                | 0.000000                | 3.462935  | -2.454150 |
| 26               | 6                | 0.000000                | -3.462935 | -2.454150 |
| 27               | 6                | 0.000000                | -2.465264 | -3.455107 |
| 28               | 1                | 0.000000                | 2.678591  | 4.526200  |
| 29               | 1                | 0.000000                | 4.476424  | 2.805174  |
| 30               | 1                | 0.000000                | -4.476424 | 2.805174  |
| 31               | 1                | 0.000000                | -2.678591 | 4.526200  |
| 32               | 1                | 0.000000                | 2.763680  | -4.498295 |
| 33               | 1                | 0.000000                | 4.506947  | -2.750503 |
| 34               | 1                | 0.000000                | -4.506947 | -2.750503 |
| 35               | 1                | 0.000000                | -2.763680 | -4.498295 |
| 36               | 1                | 0.000000                | -4.903889 | 0.020492  |
| 37               | 1                | 0.000000                | 4.903889  | 0.020492  |
| 38               | 7                | 0.000000                | 0.000000  | -3.889104 |
| 39               | 1                | 0.000000                | 0.000000  | -4.900185 |

**Table S33.** The optimized Cartesian coordinates of the compound **7** calculated at the B3LYP/6–31+G(d) level of theory

| Center Number | Atomic Number | Coordinates (Angstroms) |           |          |
|---------------|---------------|-------------------------|-----------|----------|
|               |               | X                       | Y         | Z        |
| 1             | 6             | 1.132494                | 1.478421  | 0.000000 |
| 2             | 6             | 2.104687                | 2.510951  | 0.000000 |
| 3             | 6             | 3.230304                | 0.547470  | 0.000000 |
| 4             | 6             | 1.848041                | 0.230247  | 0.000000 |
| 5             | 6             | 1.478421                | -1.132494 | 0.000000 |
| 6             | 6             | 0.230247                | -1.848041 | 0.000000 |
| 7             | 6             | 0.547470                | -3.230304 | 0.000000 |
| 8             | 6             | 2.510951                | -2.104687 | 0.000000 |
| 9             | 6             | -1.132494               | -1.478421 | 0.000000 |
| 10            | 6             | -0.230247               | 1.848041  | 0.000000 |
| 11            | 6             | -1.478421               | 1.132494  | 0.000000 |
| 12            | 6             | -1.848041               | -0.230247 | 0.000000 |
| 13            | 7             | 1.927629                | -3.362482 | 0.000000 |
| 14            | 7             | 3.362482                | 1.927629  | 0.000000 |
| 15            | 6             | -0.547470               | 3.230304  | 0.000000 |
| 16            | 6             | -2.510951               | 2.104687  | 0.000000 |
| 17            | 6             | -2.104687               | -2.510951 | 0.000000 |
| 18            | 7             | -3.362482               | -1.927629 | 0.000000 |
| 19            | 6             | -3.230304               | -0.547470 | 0.000000 |
| 20            | 6             | 3.876808                | -1.771183 | 0.000000 |
| 21            | 6             | 4.240450                | -0.430485 | 0.000000 |
| 22            | 6             | -1.771183               | -3.876808 | 0.000000 |
| 23            | 6             | -0.430485               | -4.240450 | 0.000000 |
| 24            | 6             | 0.430485                | 4.240450  | 0.000000 |
| 25            | 6             | 1.771183                | 3.876808  | 0.000000 |
| 26            | 6             | -4.240450               | 0.430485  | 0.000000 |
| 27            | 6             | -3.876808               | 1.771183  | 0.000000 |
| 28            | 1             | 4.637442                | -2.546226 | 0.000000 |
| 29            | 1             | 5.288461                | -0.146006 | 0.000000 |
| 30            | 1             | -2.546226               | -4.637442 | 0.000000 |
| 31            | 1             | -0.146006               | -5.288461 | 0.000000 |
| 32            | 1             | 0.146006                | 5.288461  | 0.000000 |
| 33            | 1             | 2.546226                | 4.637442  | 0.000000 |
| 34            | 1             | -5.288461               | 0.146006  | 0.000000 |
| 35            | 1             | -4.637442               | 2.546226  | 0.000000 |
| 36            | 1             | -4.235283               | -2.427985 | 0.000000 |
| 37            | 1             | 4.235283                | 2.427985  | 0.000000 |
| 38            | 7             | -1.927629               | 3.362482  | 0.000000 |
| 39            | 1             | -2.427985               | 4.235283  | 0.000000 |
| 40            | 1             | 2.427985                | -4.235283 | 0.000000 |

**Table S34.** The optimized Cartesian coordinates for the anion of the compound **7** calculated at the B3LYP/6–31+G(d) level of theory

| Center Number | Atomic Number | Coordinates (Angstroms) |           |          |
|---------------|---------------|-------------------------|-----------|----------|
|               |               | X                       | Y         | Z        |
| 1             | 6             | 0.025853                | 3.083078  | 1.140262 |
| 2             | 6             | -0.005518               | 1.719891  | 0.714990 |
| 3             | 6             | -0.019896               | 0.714984  | 1.720291 |
| 4             | 6             | -0.019813               | -0.715114 | 1.720377 |
| 5             | 6             | -0.021229               | -1.139992 | 3.083677 |
| 6             | 6             | -0.028755               | 1.140090  | 3.083555 |
| 7             | 6             | -0.006827               | -1.719864 | 0.714859 |
| 8             | 7             | -0.080989               | -0.000035 | 3.888616 |
| 9             | 6             | 0.017567                | -3.083516 | 1.140523 |
| 10            | 6             | -0.012051               | 2.477048  | 3.475840 |
| 11            | 6             | 0.023782                | 3.475479  | 2.477396 |
| 12            | 6             | 0.032372                | -3.475605 | 2.477859 |
| 13            | 6             | 0.009213                | -2.476678 | 3.476139 |
| 14            | 1             | -0.023744               | 2.750301  | 4.528268 |
| 15            | 1             | 0.051542                | 4.527586  | 2.750721 |
| 16            | 1             | 0.052663                | -4.527837 | 2.751396 |
| 17            | 1             | 0.010006                | -2.749656 | 4.528707 |

|    |   |           |           |           |
|----|---|-----------|-----------|-----------|
| 18 | 1 | 0.166879  | 0.001080  | 4.864277  |
| 19 | 6 | -0.005518 | 1.719891  | -0.714990 |
| 20 | 6 | 0.025853  | 3.083078  | -1.140262 |
| 21 | 6 | -0.019896 | 0.714984  | -1.720291 |
| 22 | 6 | -0.019813 | -0.715114 | -1.720377 |
| 23 | 6 | -0.006827 | -1.719864 | -0.714859 |
| 24 | 6 | -0.028755 | 1.140090  | -3.083555 |
| 25 | 6 | -0.021229 | -1.139992 | -3.083677 |
| 26 | 6 | 0.017567  | -3.083516 | -1.140523 |
| 27 | 6 | -0.012051 | 2.477048  | -3.475840 |
| 28 | 6 | 0.023782  | 3.475479  | -2.477396 |
| 29 | 6 | 0.032372  | -3.475605 | -2.477859 |
| 30 | 6 | 0.009213  | -2.476678 | -3.476139 |
| 31 | 1 | -0.023744 | 2.750301  | -4.528268 |
| 32 | 1 | 0.051542  | 4.527586  | -2.750721 |
| 33 | 1 | 0.052663  | -4.527837 | -2.751396 |
| 34 | 1 | 0.010006  | -2.749656 | -4.528707 |
| 35 | 7 | -0.080989 | -0.000035 | -3.888616 |
| 36 | 1 | 0.166879  | 0.001080  | -4.864277 |
| 37 | 7 | 0.087505  | 3.885536  | 0.000000  |
| 38 | 7 | 0.001446  | -3.884955 | 0.000000  |
| 39 | 1 | -0.111980 | 4.871862  | 0.000000  |
| 40 | 1 | 0.172107  | -4.875987 | 0.000000  |

**Table S35.** The optimized Cartesian coordinates for the dianion of the compound **7** calculated at the B3LYP/6-31+G(d) level of theory

| Center<br>Number | Atomic<br>Number | Coordinates (Angstroms) |           |           |
|------------------|------------------|-------------------------|-----------|-----------|
|                  |                  | X                       | Y         | Z         |
| 1                | 6                | 0.048341                | 3.091641  | 1.148244  |
| 2                | 6                | -0.012317               | 1.724111  | 0.710178  |
| 3                | 6                | -0.043145               | 0.710079  | 1.724335  |
| 4                | 6                | -0.046252               | -0.710411 | 1.724563  |
| 5                | 6                | -0.037358               | -1.147600 | 3.093585  |
| 6                | 6                | -0.053267               | 1.148023  | 3.092948  |
| 7                | 6                | -0.025458               | -1.724519 | 0.710232  |
| 8                | 7                | -0.138139               | -0.000319 | 3.912132  |
| 9                | 6                | 0.025520                | -3.092567 | 1.148353  |
| 10               | 6                | -0.020908               | 2.473001  | 3.488319  |
| 11               | 6                | 0.045106                | 3.486971  | 2.473713  |
| 12               | 6                | 0.066484                | -3.486257 | 2.473687  |
| 13               | 6                | 0.029260                | -2.471218 | 3.488912  |
| 14               | 1                | -0.040373               | 2.744997  | 4.543395  |
| 15               | 1                | 0.105295                | 4.540448  | 2.745881  |
| 16               | 1                | 0.099980                | -4.540972 | 2.745732  |
| 17               | 1                | 0.036132                | -2.742759 | 4.544283  |
| 18               | 1                | 0.317684                | 0.003963  | 4.813481  |
| 19               | 6                | -0.012317               | 1.724111  | -0.710178 |
| 20               | 6                | 0.048341                | 3.091641  | -1.148244 |
| 21               | 6                | -0.043145               | 0.710079  | -1.724335 |
| 22               | 6                | -0.046252               | -0.710411 | -1.724563 |
| 23               | 6                | -0.025458               | -1.724519 | -0.710232 |
| 24               | 6                | -0.053267               | 1.148023  | -3.092948 |
| 25               | 6                | -0.037358               | -1.147600 | -3.093585 |
| 26               | 6                | 0.025520                | -3.092567 | -1.148353 |
| 27               | 6                | -0.020908               | 2.473001  | -3.488319 |
| 28               | 6                | 0.045106                | 3.486971  | -2.473713 |
| 29               | 6                | 0.066484                | -3.486257 | -2.473687 |
| 30               | 6                | 0.029260                | -2.471218 | -3.488912 |
| 31               | 1                | -0.040373               | 2.744997  | -4.543395 |
| 32               | 1                | 0.105295                | 4.540448  | -2.745881 |
| 33               | 1                | 0.099980                | -4.540972 | -2.745732 |
| 34               | 1                | 0.036132                | -2.742759 | -4.544283 |
| 35               | 7                | -0.138139               | -0.000319 | -3.912132 |
| 36               | 1                | 0.317684                | 0.003963  | -4.813481 |
| 37               | 7                | 0.164896                | 3.905849  | 0.000000  |
| 38               | 7                | -0.024345               | -3.912302 | 0.000000  |
| 39               | 1                | -0.247767               | 4.827590  | 0.000000  |
| 40               | 1                | 0.448347                | -4.804355 | 0.000000  |

**Table S36.** The optimized Cartesian coordinates for the cation of the compound **7** calculated at the B3LYP/6–31+G(d) level of theory

| Center<br>Number | Atomic<br>Number | Coordinates (Angstroms) |           |          |
|------------------|------------------|-------------------------|-----------|----------|
|                  |                  | X                       | Y         | Z        |
| 1                | 6                | -0.381033               | 1.819128  | 0.000000 |
| 2                | 6                | -0.519253               | 3.235252  | 0.000000 |
| 3                | 6                | 1.711701                | 2.794022  | 0.000000 |
| 4                | 6                | 1.044821                | 1.537128  | 0.000000 |
| 5                | 6                | 1.819128                | 0.381033  | 0.000000 |
| 6                | 6                | 1.537128                | -1.044821 | 0.000000 |
| 7                | 6                | 2.794022                | -1.711701 | 0.000000 |
| 8                | 6                | 3.235252                | 0.519253  | 0.000000 |
| 9                | 6                | 0.381033                | -1.819128 | 0.000000 |
| 10               | 6                | -1.537128               | 1.044821  | 0.000000 |
| 11               | 6                | -1.819128               | -0.381033 | 0.000000 |
| 12               | 6                | -1.044821               | -1.537128 | 0.000000 |
| 13               | 7                | 3.783286                | -0.748244 | 0.000000 |
| 14               | 7                | 0.748244                | 3.783286  | 0.000000 |
| 15               | 6                | -2.794022               | 1.711701  | 0.000000 |
| 16               | 6                | -3.235252               | -0.519253 | 0.000000 |
| 17               | 6                | 0.519253                | -3.235252 | 0.000000 |
| 18               | 7                | -0.748244               | -3.783286 | 0.000000 |
| 19               | 6                | -1.711701               | -2.794022 | 0.000000 |
| 20               | 6                | 3.885097                | 1.767302  | 0.000000 |
| 21               | 6                | 3.113161                | 2.919857  | 0.000000 |
| 22               | 6                | 1.767302                | -3.885097 | 0.000000 |
| 23               | 6                | 2.919857                | -3.113161 | 0.000000 |
| 24               | 6                | -2.919857               | 3.113161  | 0.000000 |
| 25               | 6                | -1.767302               | 3.885097  | 0.000000 |
| 26               | 6                | -3.113161               | -2.919857 | 0.000000 |
| 27               | 6                | -3.885097               | -1.767302 | 0.000000 |
| 28               | 1                | 4.967755                | 1.831106  | 0.000000 |
| 29               | 1                | 3.584289                | 3.896718  | 0.000000 |
| 30               | 1                | 1.831106                | -4.967755 | 0.000000 |
| 31               | 1                | 3.896718                | -3.584289 | 0.000000 |
| 32               | 1                | -3.896718               | 3.584289  | 0.000000 |
| 33               | 1                | -1.831106               | 4.967755  | 0.000000 |
| 34               | 1                | -3.584289               | -3.896718 | 0.000000 |
| 35               | 1                | -4.967755               | -1.831106 | 0.000000 |
| 36               | 1                | -0.944247               | -4.774316 | 0.000000 |
| 37               | 1                | 0.944247                | 4.774316  | 0.000000 |
| 38               | 7                | -3.783286               | 0.748244  | 0.000000 |
| 39               | 1                | -4.774316               | 0.944247  | 0.000000 |
| 40               | 1                | 4.774316                | -0.944247 | 0.000000 |

**Table S37.** The optimized Cartesian coordinates for the dication of the compound **7** calculated at the B3LYP/6–31+G(d) level of theory

| Center<br>Number | Atomic<br>Number | Coordinates (Angstroms) |           |          |
|------------------|------------------|-------------------------|-----------|----------|
|                  |                  | X                       | Y         | Z        |
| 1                | 6                | -0.390335               | 1.817607  | 0.000000 |
| 2                | 6                | -0.521044               | 3.242123  | 0.000000 |
| 3                | 6                | 1.721645                | 2.796209  | 0.000000 |
| 4                | 6                | 1.055948                | 1.530043  | 0.000000 |
| 5                | 6                | 1.817607                | 0.390335  | 0.000000 |
| 6                | 6                | 1.530043                | -1.055948 | 0.000000 |
| 7                | 6                | 2.796209                | -1.721645 | 0.000000 |
| 8                | 6                | 3.242123                | 0.521044  | 0.000000 |
| 9                | 6                | 0.390335                | -1.817607 | 0.000000 |
| 10               | 6                | -1.530043               | 1.055948  | 0.000000 |
| 11               | 6                | -1.817607               | -0.390335 | 0.000000 |
| 12               | 6                | -1.055948               | -1.530043 | 0.000000 |
| 13               | 7                | 3.769508                | -0.749491 | 0.000000 |
| 14               | 7                | 0.749491                | 3.769508  | 0.000000 |
| 15               | 6                | -2.796209               | 1.721645  | 0.000000 |
| 16               | 6                | -3.242123               | -0.521044 | 0.000000 |

|    |   |           |           |          |
|----|---|-----------|-----------|----------|
| 17 | 6 | 0.521044  | -3.242123 | 0.000000 |
| 18 | 7 | -0.749491 | -3.769508 | 0.000000 |
| 19 | 6 | -1.721645 | -2.796209 | 0.000000 |
| 20 | 6 | 3.894433  | 1.768162  | 0.000000 |
| 21 | 6 | 3.123441  | 2.921836  | 0.000000 |
| 22 | 6 | 1.768162  | -3.894433 | 0.000000 |
| 23 | 6 | 2.921836  | -3.123441 | 0.000000 |
| 24 | 6 | -2.921836 | 3.123441  | 0.000000 |
| 25 | 6 | -1.768162 | 3.894433  | 0.000000 |
| 26 | 6 | -3.123441 | -2.921836 | 0.000000 |
| 27 | 6 | -3.894433 | -1.768162 | 0.000000 |
| 28 | 1 | 4.976912  | 1.832389  | 0.000000 |
| 29 | 1 | 3.596870  | 3.897413  | 0.000000 |
| 30 | 1 | 1.832389  | -4.976912 | 0.000000 |
| 31 | 1 | 3.897413  | -3.596870 | 0.000000 |
| 32 | 1 | -3.897413 | 3.596870  | 0.000000 |
| 33 | 1 | -1.832389 | 4.976912  | 0.000000 |
| 34 | 1 | -3.596870 | -3.897413 | 0.000000 |
| 35 | 1 | -4.976912 | -1.832389 | 0.000000 |
| 36 | 1 | -0.947392 | -4.764835 | 0.000000 |
| 37 | 1 | 0.947392  | 4.764835  | 0.000000 |
| 38 | 7 | -3.769508 | 0.749491  | 0.000000 |
| 39 | 1 | -4.764835 | 0.947392  | 0.000000 |
| 40 | 1 | 4.764835  | -0.947392 | 0.000000 |

---
